# Supplementary material for: Novel tool to quantify cell wall porosity relates wall structure to cell growth and drug uptake
Source: PubMed Central journal article supplement — J Cell Biol. 2019 Feb 19;218(4):1408–21. doi: 10.1083/jcb.201810121 (PMC6446840; doi:10.1083/jcb.201810121), 2019-02-19
Supplement: JCB_201810121_review_history.pdf [file JCB_201810121_review_history.pdf]

# Novel tool to quantify cell wall porosity relates wall structure to cell growth and drug uptake

Xiaohui Liu, Jiazhou Li, Heyu Zhao, Boyang Liu, Thomas Gunther-Pomorski, Shaolin Chen, and Johannes Liesche

*Corresponding Author(s): Johannes Liesche, Northwest A&F University*

---

|                         |                     |            |
|-------------------------|---------------------|------------|
| <b>Review Timeline:</b> | Submission Date:    | 2018-10-25 |
|                         | Editorial Decision: | 2018-11-14 |
|                         | Revision Received:  | 2019-01-08 |
|                         | Editorial Decision: | 2019-01-22 |
|                         | Revision Received:  | 2019-01-25 |

---

*Monitoring Editor: Dominique Bergmann*

*Scientific Editor: Andrea Marat*

## Transaction Report:

(Note: With the exception of the correction of typographical or spelling errors that could be a source of ambiguity, letters and reports are not edited. The original formatting of letters and referee reports may not be reflected in this compilation.)

**DOI: <https://doi.org/10.1083/jcb.201810121>**

November 14, 2018

Re: JCB manuscript #201810121

Dr. Johannes Liesche  
Northwest A&F University  
College of Life Sciences  
Nongling Rd 1  
Yangling 712100  
China

Dear Dr. Liesche,

Thank you for submitting your manuscript entitled "In vivo quantification of cell wall porosity relates wall structure to cell growth and drug uptake". The manuscript was assessed by expert reviewers, whose comments are appended to this letter. We invite you to submit a revision if you can address the reviewers' key concerns, as outlined here.

You will see that all three reviewers appreciate that your manuscript characterizes a simple and needed tool to measure porosity, an aspect of plant cell wall structure. An important additional experiment would be to test the ability of this technique to report changes in porosity in the opposite direction as the mutants being utilized, therefore rev 2's straightforward suggestion to use a chemical inhibitor is essential. Requested changes to the text made by all reviewers should be addressed, and we hope that you will be able to address all of the remaining reviewer comments in your revised manuscript.

While you are revising your manuscript, please also attend to the following editorial points to help expedite the publication of your manuscript. Please direct any editorial questions to the journal office.

#### GENERAL GUIDELINES:

**Text limits:** Character count for Tools is < 40,000, not including spaces. Count includes title page, abstract, introduction, results, discussion, acknowledgments, and figure legends. Count does not include materials and methods, references, tables, or supplemental legends.

**Figures:** Tools may have up to 10 main text figures. Figures must be prepared according to the policies outlined in our Instructions to Authors, under Data Presentation, <http://jcb.rupress.org/site/misc/ifora.xhtml>. All figures in accepted manuscripts will be screened prior to publication.

**\*\*\*IMPORTANT:** It is JCB policy that if requested, original data images must be made available. Failure to provide original images upon request will result in unavoidable delays in publication. Please ensure that you have access to all original microscopy and blot data images before submitting your revision.\*\*\*

**Supplemental information:** There are strict limits on the allowable amount of supplemental data.

Tools may have up to 5 supplemental figures. Up to 10 supplemental videos or flash animations are allowed. A summary of all supplemental material should appear at the end of the Materials and methods section.

The typical timeframe for revisions is three months; if submitted within this timeframe, novelty will not be reassessed at the final decision. Please note that papers are generally considered through only one revision cycle, so any revised manuscript will likely be either accepted or rejected.

When submitting the revision, please include a cover letter addressing the reviewers' comments point by point. Please also highlight all changes in the text of the manuscript.

We hope that the comments below will prove constructive as your work progresses. We would be happy to discuss them further once you've had a chance to consider the points raised in this letter.

Thank you for this interesting contribution to Journal of Cell Biology. You can contact us at the journal office with any questions, [cellbio@rockefeller.edu](mailto:cellbio@rockefeller.edu) or call (212) 327-8588.

Sincerely,

Dominique Bergmann, PhD  
Monitoring Editor

Andrea L. Marat, PhD  
Scientific Editor

Journal of Cell Biology

-----  
Reviewer #1 (Comments to the Authors (Required)):

This ms describes an original technique to quantify in vivo cell wall porosity based on the quenching of the plasma membrane dye FM4-64 with the small molecules "black hole quencher 3", "malachite green" or "trypan blue" (TB). The authors show that the quenching efficiency depends on the accessibility of the quencher, which is reduced in yeast or bacteria, which have a cell wall, relative to HEK cells or GUVs. They test a few plant cell wall mutants and observe a reduction in quenching efficiency in root epidermis cells for some of them, indicating that the porosity of the walls is reduced in these mutants. There does not seem to be a correlation with cell wall thickness, although this is difficult to say given the small sample size and the fact that the cell wall mutants can affect other things than just cell wall thickness. The authors try to establish a correlation between wall porosity (measured by the quenching efficiency of TB) and the ability of the roots to increase their growth upon drought stress. They observe that the porosity increases with the increase in cell length in the WT, that relative porosity is correlated with relative cell length. The authors conclude from this that increased porosity is a consequence rather a precondition for an increase in growth rate. Finally the authors show that the technique also works in yeast and thus could be used to identify compounds that facilitate the penetration of antifungal drugs into the cell wall.

There is certainly a need in the cell wall field to measure cell wall porosity in living cells, since it is thought to be critical for growth control and technological characteristics such as the degradability

of the cell wall. Therefore I appreciate very much such a simple technique to measure porosity. I have doubts however whether the ms fits the scope and meets the standards of JCB. For this I would have liked to see how the technique can be used for instance to obtain novel information on the role of cell wall changes in the control of plant cell expansion.

Minor remarks:

Typos: p3, line 78: "saccarification", p.6 line 158 "notes"  
p.4. explain "GUV" in text

Reviewer #2 (Comments to the Authors (Required)):

In the manuscript "In vivo quantification of cell wall porosity relates wall structure to cell growth and drug uptake", Liu et al. outline a technical study aimed at developing an in vivo method to assess cell wall structural status. The method hinges on the quenching of the plasma membrane dye FM4-64 by black hole quencher 3, malachite green or trypan blue, which were chosen based on their sizes and spectral properties. The authors go on to show that quenching efficiency can be used to correlate cell wall structure/permeability and extensibility in Arabidopsis and permeability in yeast. Let me start by saying that I am enthusiastic about this manuscript and I do see a lot of value in what the authors have developed. The manuscript is well organized and written and the experiments are appropriate.

I do have one suggestion that I think is required to bolster the existing results. In the work comparing Arabidopsis cell wall mutants with wild type to assess cell wall porosity, the mutants that the authors have chosen all show a reduction in quenching efficiency. Since this is an important aspect of the paper, it would be useful here to have a contrasting effect either by mutation or chemical treatment (for example, by an cell wall synthesis inhibitor). I would favour using an inhibitor because it can be dosed and can be applied at different stages of growth. It would also provide a proof of principle that the technique could be used in chemical screening as the authors suggest (line 290). What was the reasoning behind using the specific mutants that were used? There are many cell wall mutants to choose from and it wasn't clear why these were the most appropriate.

Minor point: mur11 has been positionally cloned (Plant J. 2011(4):715-25).

Reviewer #3 (Comments to the Authors (Required)):

The manuscript by Liu et al., takes advantage of quenching effects compounds like tryphanblue, malachite green, BH3 have on the fluorescence of FM-464. The authors use this to investigate porosity of extracellular matrix in different cell types with a particular focus on plant cell walls. They use a combination of different imaging tools, mutants and analytical methods to try and turn the quenching effect into an analytical tool useful in different biological contexts (plants, yeast) and try to draw conclusions about changes in the mutant or treated cell walls.

While I do like the concept and see the potential of the assay for genetic screens I think there are a few issues. First of all I struggle to follow the story line in places, therefore I think the manuscript would benefit from clearer writing, highlighting of important points and a summary table correlating effects of mutants (specific changes in cell wall composition and structure) or treatments etc. on

quenching efficiency. This may also lead to me missing some points, which may address my following rather fundamental concerns about the work. An essential element to maximize the information value of the assay is a thorough understanding of what change is actually detected in their assay. Is it actual porosity or simply a change in structure and composition of the walls caused by the mutations / treatments, which could affect accessibility for the quencher molecules based on something else (like charge of the cell wall matrix). Currently the authors show supportive qualitative, but not quantitative data that the cell walls have a different porosity /differ from controls. I think this is a serious limitation and they should try to find a way to turn this qualitative assay (yes there´s a difference / no there´s no difference) into something quantitative where they are confident that they are detecting quantitative changes in porosity and not something else.

Minor comments: Throughout the manuscript there is a large number of smaller and larger problems with the text / figure legends etc. I´ve listed below representative examples to show the authors what they need to check / correct throughout the manuscript:

- Abbreviations used need to be defined in the text when they are used the 1st time (example: line 103 GUV)
- Sup. Figure 1 is not described in main text
- Wording of figure legends need to be modified to meet scientific standards (examples figure 1 and supl. Figure S2: both descriptive / interpretative text)
- Supl. Figure 2 is mentioned with one very general sentence with limited information value in the main text. I think this needs to be expanded....
- Line 115: citation for Stern-Volmer equation is missing (Lehrer 1971)
- Figure 6 and 7 are interesting but at least figure 7 should be supplemental
- The authors do not discuss possible effects the different charges of the quencher molecules could have on interactions between the quencher molecules and the cell wall matrix. While I think figure 1 contains a nice graphical illustration of the different quencher molecules, it doesn´t really provide info regarding charges of the quencher molecules.
- The statement in line 225 is a bit trivial and devalues the work the authors have done. I suggest rephrasing.

**Point-by-point response to the reviewers' comments**

We thank both reviewers for their positive response to our original manuscript and helpful comments.

**Reviewer #1**

*There does not seem to be a correlation with cell wall thickness, although this is difficult to say given the small sample size and the fact that the cell wall mutants can affect other things than just cell wall thickness.*

We agree that, considering the sample number and nature of samples, the conclusion from this experiment should be formulated more carefully. We changed the respective part in the discussion (line 250 to 253). In light of the new results showing a significant correlation of cellulose fibril spacing and quenching efficiency, we chose not to conduct additional experiments on cell wall thickness.

*I have doubts however whether the ms fits the scope and meets the standards of JCB. For this I would have liked to see how the technique can be used for instance to obtain novel information on the role of cell wall changes in the control of plant cell expansion.*

We imagine this method to become one of the standard methods for evaluating the effect of certain genes/proteins on cell wall structure. Indeed, in co-author Chen Shaolin's lab this method is now being used to evaluate the genetic basis of the effect of environmental dynamics on cellulose biosynthesis. Furthermore, while the porosity change was indicated here to not be a precondition for root cell extension growth, this might be different in other cells, for example root hair growth. We extended the respective section in the discussion (Line 311-314).

*Minor remarks:*

*Typos: p3, line 78: "saccharification", p.6 line 158 "notes"*

This mistake has been corrected.

*p.4. explain "GUV" in text*

Explanation was added (line 108).

**Reviewer #2:**

*I do have one suggestion that I think is required to bolster the existing results. In the work comparing Arabidopsis cell wall mutants with wild type to assess cell wall porosity, the mutants that the authors have chosen all show a reduction in quenching efficiency. Since this is an important aspect of the paper, it would be useful here to have a contrasting effect either by mutation or chemical treatment (for example, by a cell wall synthesis inhibitor). I would favour using an inhibitor because it can be dosed and can be applied at different stages of growth. It would also provide a proof of principle that the technique could be used in chemical screening as the authors suggest (line 290).*

In the original manuscript we already documented the effect of the simulated drought treatment, which was shown to increase quenching efficiency. In addition, we realized the idea provided here of including cell wall inhibitors. Two inhibitors (Isoxaben and DCBN) were tested and both increased quenching efficiency of all three quencher. Taken together the results make a strong case for the assay having a useful dynamic range in the positive as well as negative direction. Figure 3, as well as results, methods and discussion sections were updated.

*What was the reasoning behind using the specific mutants that were used? There are many cell wall mutants to choose from and it wasn't clear why these were the most appropriate.*

Indeed, the selection of mutants was mainly based on our literature study and subsequent efforts to obtain seeds of homozygous plants. The only criteria for selecting mutants was that they affect different wall components. We added this information to the methods section. (lines 367f)

*Minor point: mur11 has been positionally cloned (Plant J. 2011(4):715-25).*

Thank you for making us aware of this. We updated Table 1 and included the reference.

**Reviewer #3:**

*While I do like the concept and see the potential of the assay for genetic screens I think there are a few issues. First of all I struggle to follow the story line in places, therefore I think the manuscript would benefit from clearer writing, highlighting of important points and a summary table correlating effects of mutants (specific changes in cell wall composition and structure) or treatments etc. on quenching efficiency.*

Considering the positive comments that other reviewers made about writing and structure of the manuscript, we did not make major changes. We assume that the lack of evidence for how exactly quenching efficiency relates to cell wall structure in the original version caused some confusion. This should be alleviated in the revised version, where we included new experiments that show the significant correlation of quenching efficiency and cellulose fibril density. Now the structure ( 1) showing the quenching effect, 2) proving its relation to cell wall structure and 3) application example) should be clearer.

*This may also lead to me missing some points, which may address my following rather fundamental concerns about the work. An essential element to maximize the information value of the assay is a thorough understanding of what change is actually detected in their assay. Is it actual porosity or simply a change in structure and composition of the walls caused by the mutations / treatments, which could affect accessibility for the quencher molecules based on something else (like charge of the cell wall matrix). Currently the authors show supportive qualitative, but not quantitative data that the cell walls have a different porosity /differ from controls. I think this is a serious limitation and they should try to find a way to turn this qualitative assay (yes there's a difference / no there's no difference) into something quantitative where they are confident that they are detecting quantitative changes in porosity and not something else.*

We agree with the reviewer that not providing stronger prove was a clear shortcoming of the manuscript. Accordingly, it was the main point we strived to address in the revision. After experimenting with TEM, SEM and AFM, we finally found a different, more efficient way of conducting a quantitative analysis of the relationship of cell wall structure and quenching efficiency. We stained cellulose fibril with a fluorescent dye, then did 3D confocal imaging combined with image deconvolution. This yielded a high enough resolution to observe differences in the pattern of cellulose fibril organization as well as cellulose fibril density. After analysing all plants that we also determined the quenching efficiency for (including the newly added plants that were exposed to cell wall synthesis inhibitors), we could perform a correlation analysis. Indeed, we found a significant correlation of quenching efficiency and cellulose fibril density. These results provide a quantitative basis for the conclusion that the quenching assay can measure changes in cell wall porosity.

These new results are presented in the revised Fig. 3, and integrated in the methods, results and discussion sections.

*Minor comments: Throughout the manuscript there is a large number of smaller and larger problems with the text / figure legends etc. I've listed below representative examples to show the authors what they need to check / correct throughout the manuscript:*

*We apologize for these mistakes which have now been corrected.*

*- Abbreviations used need to be defined in the text when they are used the 1st time (example: line 103 GUV)*

This has been corrected.

*- Sup. Figure 1 is not described in main text*

The reference to Suppl. Fig. S1 was in the methods section. The numbering of the supplemental figures was corrected (i.e. Fig. S1 became S5).

*- Wording of figure legends need to be modified to meet scientific standards (examples figure 1 and suppl. Figure S2: both descriptive / interpretative text)*

All figure legends were revised to adhere to the JCB format. Interpretative text was removed from the figure legends of figures 1, 3 and S2.

**- Supl. Figure 2 is mentioned with one very general sentence with limited information value in the main text. I think this needs to be expanded....**

Details of the experiment presented in Suppl. Fig. S2 (now S1) were integrated in the main text. Lines 95 to 97.



- Line 115: citation for Stern-Volmer equation is missing (Lehrer 1971)

The reference was added at that position. (Line 122)

*- Figure 6 and 7 are interesting but at least figure 7 should be supplemental*

Since the limit of supplemental figures was already reached, we chose to delete Figure 7 entirely. We agree with the reviewer that its information content is too limited for the main text and, furthermore, the differences are sufficiently explained in the discussion section.

*- The authors do not discuss possible effects the different charges of the quencher molecules could have on interactions between the quencher molecules and the cell wall matrix. While I think figure 1 contains a nice graphical illustration of the different quencher molecules, it doesn't really provide info regarding charges of the quencher molecules.*

Following the Reviewer's suggestion, we have included charges in Fig. 1. There is no indication that they influence quenching efficiency as tested here (e.g. BHQ and MG have similar charge but very different quenching efficiency). The results section (Line 145-150) and the discussion section (line 266-269) were updated accordingly.

*- The statement in line 225 is a bit trivial and devalues the work the authors have done. I suggest rephrasing.*

Following the Reviewer's suggestion, the sentence was deleted as the characteristics of this assay are described at other positions of the discussion. For example, its simplicity is stressed with regard to its potential usefulness for high-content screening (line 315f).

January 22, 2019

RE: JCB Manuscript #201810121R

Dr. Johannes Liesche  
Northwest A&F University  
College of Life Sciences  
Nongling Rd 1  
Yangling 712100  
China

Dear Dr. Liesche:

Thank you for submitting your revised manuscript entitled "In vivo quantification of cell wall porosity relates wall structure to cell growth and drug uptake". We would be happy to publish your paper in JCB pending final revisions necessary to meet our formatting guidelines (see details below).

To avoid unnecessary delays in the acceptance and publication of your paper, please read the following information carefully.

#### A. MANUSCRIPT ORGANIZATION AND FORMATTING:

Full guidelines are available on our Instructions for Authors page, <http://jcb.rupress.org/submission-guidelines#revised>. \*\*Submission of a paper that does not conform to JCB guidelines will delay the acceptance of your manuscript.\*\*

1) Text limits: Character count for Tools is < 40,000, not including spaces. Count includes title page, abstract, introduction, results, discussion, acknowledgments, and figure legends. Count does not include materials and methods, references, tables, or supplemental legends.

2) Figures limits: Tools may have up to 10 main text figures.

3) Figure formatting: Scale bars must be present on all microscopy images, including inset magnifications. Molecular weight or nucleic acid size markers must be included on all gel electrophoresis.

4) Statistical analysis: Error bars on graphic representations of numerical data must be clearly described in the figure legend. The number of independent data points (n) represented in a graph must be indicated in the legend. Statistical methods should be explained in full in the materials and methods. For figures presenting pooled data the statistical measure should be defined in the figure legends. Please also be sure to indicate the statistical tests used in each of your experiments (either in the figure legend itself or in a separate methods section) as well as the parameters of the test (for example, if you ran a t-test, please indicate if it was one- or two-sided, etc.). Also, if you used parametric tests, please indicate if the data distribution was tested for normality (and if so, how). If not, you must state something to the effect that "Data distribution was assumed to be normal but this was not formally tested."

5) \* Abstract and title: The abstract should be no longer than 160 words and should communicate the significance of the paper for a general audience. The addition of a conclusion sentence for the abstract is recommended. The title should be less than 100 characters including spaces. Make the title concise but accessible to a general readership, it is advisable to modify your title to include that your paper describes a new technique. For the running title we suggest: A quenching tool to measure cell wall porosity

6) Materials and methods: Should be comprehensive and not simply reference a previous publication for details on how an experiment was performed. Please provide full descriptions in the text for readers who may not have access to referenced manuscripts.

7) Please be sure to provide the sequences for all of your primers/oligos and RNAi constructs in the materials and methods. You must also indicate in the methods the source, species, and catalog numbers (where appropriate) for all of your antibodies.

8) Microscope image acquisition: The following information must be provided about the acquisition and processing of images:

a. Make and model of microscope

b. Type, magnification, and numerical aperture of the objective lenses

c. Temperature

d. Imaging medium

e. Fluorochromes

f. Camera make and model

g. Acquisition software

h. Any software used for image processing subsequent to data acquisition. Please include details and types of operations involved (e.g., type of deconvolution, 3D reconstitutions, surface or volume rendering, gamma adjustments, etc.).

9) References: There is no limit to the number of references cited in a manuscript. References should be cited parenthetically in the text by author and year of publication. Abbreviate the names of journals according to PubMed.

10) Supplemental materials: There are strict limits on the allowable amount of supplemental data. Tools may have up to 5 supplemental display items (figures and tables). Please also note that tables, like figures, should be provided as individual, editable files. A summary of all supplemental material should appear at the end of the Materials and methods section.

11) eTOC summary: A ~40-50-word summary that describes the context and significance of the findings for a general readership should be included on the title page. The statement should be written in the present tense and refer to the work in the third person.

12) Conflict of interest statement: JCB requires inclusion of a statement in the acknowledgements regarding competing financial interests. If no competing financial interests exist, please include the following statement: "The authors declare no competing financial interests." If competing interests are declared, please follow your statement of these competing interests with the following statement: "The authors declare no further competing financial interests."

13) ORCID IDs: ORCID IDs are unique identifiers allowing researchers to create a record of their various scholarly contributions in a single place. At resubmission of your final files, please consider providing an ORCID ID for as many contributing authors as possible.

14) A separate author contribution section following the Acknowledgments. All authors should be mentioned and designated by their full names. We encourage use of the CRediT nomenclature.

## B. FINAL FILES:

Please upload the following materials to our online submission system. These items are required prior to acceptance. If you have any questions, contact JCB's Managing Editor, Lindsey Hollander (lhollander@rockefeller.edu).

-- An editable version of the final text (.DOC or .DOCX) is needed for copyediting (no PDFs).

-- High-resolution figure and video files: See our detailed guidelines for preparing your production-ready images, <http://jcb.rupress.org/fig-vid-guidelines>.

-- Cover images: If you have any striking images related to this story, we would be happy to consider them for inclusion on the journal cover. Submitted images may also be chosen for highlighting on the journal table of contents or JCB homepage carousel. Images should be uploaded as TIFF or EPS files and must be at least 300 dpi resolution.

\*\*It is JCB policy that if requested, original data images must be made available to the editors. Failure to provide original images upon request will result in unavoidable delays in publication. Please ensure that you have access to all original data images prior to final submission.\*\*

\*\*The license to publish form must be signed before your manuscript can be sent to production. A link to the electronic license to publish form will be sent to the corresponding author only. Please take a moment to check your funder requirements before choosing the appropriate license.\*\*

Thank you for your attention to these final processing requirements. Please revise and format the manuscript and upload materials within 7 days.

Please contact the journal office with any questions, [cellbio@rockefeller.edu](mailto:cellbio@rockefeller.edu) or call (212) 327-8588.

Thank you for this interesting contribution, we look forward to publishing your paper in Journal of Cell Biology.

Sincerely,

Dominique Bergmann, PhD  
Monitoring Editor

Andrea L. Marat, PhD  
Scientific Editor

Journal of Cell Biology

---

Reviewer #2 (Comments to the Authors (Required)):

The suggested changes have been addressed and the manuscript is acceptable.

Reviewer #3 (Comments to the Authors (Required)):

I think the additional experiments performed and modifications made to the manuscript have improved it nicely. The authors have satisfied my concerns...

1 | ~~In vivo quantification of~~Novel tool to quantify cell wall porosity relates wall structure to cell  
2 growth and drug uptake

3  
4 Xiaohui Liu<sup>1, 2</sup>, Jiazhou Li<sup>1, 2</sup>, Heyu Zhao<sup>1, 2</sup>, Boyang Liu<sup>1, 2</sup>, Thomas Günther Pomorski<sup>3,4</sup>, Shaolin  
5 Chen<sup>1, 2</sup>, Johannes Liesche<sup>1, 2</sup>

6  
7 <sup>1</sup> College of Life Sciences, Northwest A&F University, 712100 Yangling, China

8 <sup>2</sup> Biomass Energy Center for Arid Lands, Northwest A&F University, 712100 Yangling, China

9 <sup>3</sup> Department of Plant and Environmental Sciences, University of Copenhagen, 1871 Frederiksberg,  
10 Denmark

11 <sup>4</sup> Department of Molecular Biochemistry, Faculty of Chemistry and Biochemistry, Ruhr University  
12 Bochum, 44780 Bochum, Germany

13 |  
14 Running title

15 A quenching tool to measure cell wall porosity  
16

17 **Abstract**

18 Even though cell walls have essential functions for bacteria, fungi and plants, tools to investigate their  
19 dynamic structure in living cells have been missing. Here, it is shown that changes in the intensity of  
20 the plasma membrane dye FM4-64 in response to extracellular quenchers depend on the nano-scale  
21 porosity of cell walls. The correlation of quenching efficiency and cell wall porosity is supported by  
22 tests on various cell types, application of differently sized quenchers and comparison of results with  
23 confocal, electron and atomic force microscopy images.

24 The quenching assay was used to investigate how changes in cell wall porosity affect the capability for  
25 extension growth in the model plant *Arabidopsis thaliana*. Results suggest that increased porosity is not  
26 a precondition but a result of cell extension, thereby providing new insight on the mechanism plant  
27 organ growth. Furthermore, it was shown that higher cell wall porosity can facilitate the action of anti-  
28 fungal drugs in *Saccharomyces cerevisiae*, presumably by facilitating uptake.

29  
30 **Summary**

31 Cell wall porosity of fungi and plants could not be determined *in vivo* previously. Application of a  
32 novel method links dynamic changes in wall porosity to stress-induced cell elongation in plant roots  
33 and uptake of anti-fungal drugs in yeast cells.

34

### 35 **Introduction**

36 Bacterial, fungal and plant cells depend on cell walls for mechanical support, the determination of cell  
37 shape and size, and a multitude of additional functions that are essential for the life of these organisms  
38 (Cosgrove 2000; Mattei et al. 2010; Winstel et al. 2013). Bacterial cell walls are a primary target for  
39 antibiotics (Young 2016; Brown and Wright 2016), just like the fungal cell wall is a target for the  
40 treatment of fungal infections (Burnham-Marusich et al. 2018). Plant cell walls form the starting  
41 material for many commercial products (Klemm et al. 2005) and are the main feedstock to produce  
42 second generation biofuels (Carroll and Somerville 2009).

43 Cell walls vary in complexity from the single-polymer of gram-positive bacteria to the specialized  
44 network of different polysaccharides and proteins in plants (Meeske et al. 2015; Gow et al. 2017;  
45 Burton et al. 2010). The complexity, together with the nanometer-scale dimensions and the wall's  
46 sensitivity to sample preparation processes, have limited the investigation of cell wall structure,  
47 especially in plant cell walls. The precise arrangement of the different cell wall components within a  
48 plant cell wall and the mechanism of dynamic changes in wall structure remain unknown (Cosgrove  
49 2016). In addition, the lack of simple tools to probe cell wall structure prevents a detailed functional  
50 characterization of the many genes that have been implicated in wall synthesis and remodeling  
51 (Somerville 2004; Schneider and Persson 2015; Taylor-Teeple et al. 2015).

52 One parameter of cell wall structure is the porosity, which describes the capacity for molecular  
53 movement within the wall and is related to the spacing between wall polysaccharides. Porosity  
54 correlates with cell wall digestibility and saccharification efficiency, as used for biofuel production  
55 (Himmel et al. 2007; Ding et al. 2012; Tavares et al. 2015). In rice, cell wall porosity was linked to  
56 mesophyll conductance for CO<sub>2</sub>, showing that it can even limit the photosynthetic capacity (Ellsworth  
57 et al. 2018). Furthermore, porosity influences the kinetics and capacity of a plant's leaf water uptake  
58 (Boaneres et al. 2018). In bacteria, porosity could be linked to cell growth (Huang et al. 2008; Turner et  
59 al. 2013). In plants, however, no consensus on the relationship of cell wall structure and cell wall

60 extensibility could be reached so far (Bidhendi and Geitmann, 2016; Cosgrove 2016), which reflects  
61 our inability to follow dynamic changes in wall structure.

62 Currently available methods for determining the porosity of cell walls have significant shortcomings  
63 (Adani et al. 2011). Transmission electron microscopy, which could be used to visualize areas of  
64 different density within cell walls at nanometer resolution, requires fixation and dehydration of the  
65 sample, potentially introducing artifacts. The less invasive cryo-electron microscopy has been used to  
66 visualize spaces between cellulose fibrils, but its resolution appears limited to 20 nm (Derksen et al.  
67 2011, Zheng et al. 2017). A higher resolution and quantitative data of pore size distributions and pore  
68 surface area can be obtained by gas adsorption, but also requires harsh sample treatment (Adani et al.,  
69 2011). To assess the actual capacity for molecular movement within the wall, especially that of living  
70 cells, approaches based on fluorescence spectroscopy or microscopy have been developed. De Nobel  
71 (1990) assessed the relative porosity of yeast cell walls by spectroscopically measuring the chemically-  
72 induced release of UV-absorbing cellular compounds. This assay could show differences between  
73 fungal species but impacts cell function and cannot be applied to complex tissues. Donaldson et al.  
74 (2015) used fluorescence quenching to quantify the porosity of dewatered wood, but their method is  
75 restricted to secondary cell walls as it depends on lignin autofluorescence.

76 In the present study, we aimed to establish a method to quantify cell wall porosity in different cell  
77 types, including those with primary cell walls, *in vivo*. It was hypothesized that access of a small, freely  
78 diffusing extracellular molecule to the plasma membrane depends on the structure of the extracellular  
79 matrix. The hypothesis was tested and confirmed by measuring the quenching effect of an extracellular  
80 quencher on the membrane-specific dye FM4-64 in lipid vesicles as well as mammalian, bacterial,  
81 fungal and plant cells.

82 While this method is relevant for various applications, including assessing the saccharification potential  
83 of cellulosic biomass, its value was demonstrated here by investigating the relationship of cell wall  
84 structure and extension growth in the model plant *Arabidopsis thaliana*, as well as the effect of cell  
85 wall structure on the uptake of anti-fungal drugs in the yeast model *Saccharomyces cerevisiae*.

86

## 87 **Results**

### 88 *Selection of quenchers for FM4-64*



89 The requirements towards quenchers for the membrane-specific dye FM4-64 are i) spectral overlap  
90 between dye emission and quencher absorption, ii) a dynamic quenching mechanism, iii) membrane  
91 impermeability. Of the commonly used quenchers, Black Hole Quencher 3 (BHQ3), Malachite Green  
92 (MG) and Trypan Blue (TB) have adequate sizes to investigate the nanoscale structure of cell walls  
93 (Fig. 1A). TB acts as a dynamic quencher as demonstrated by the shortening of the fluorescence  
94 lifetime of the Bodipy FL fluorophore in the presence of TB (Fig. 1B). A similar behavior has been  
95 shown previously for MG (Rolinski et al. 1999), while BHQ3 can act as dynamic as well as static  
96 quencher (Crisalli and Kool 2011). Dynamic quenching capacity was furthermore indicated by  
97 quenching efficiency correlating with the spectral overlap of quencher absorption and dye emission  
98 (Suppl. Fig. S1). TB quenched the fluorescent dye Basic Fuchsin, whose emission spectrum overlaps  
99 the TB absorption spectrum almost completely, with much higher efficiency than Bodipy FL, whose  
100 emission spectrum only overlaps about 20% (Suppl. Fig. S1). TB did not show measurable quenching  
101 of Calcofluor White (CW), whose emission peak is completely separated from the peak of TB  
102 absorption (Suppl. Fig. S1). The spectral overlap of quencher absorption with the emission of FM4-64  
103 in the yeast plasma membrane was found to be between 20% for TB and 45% for BHQ3 (Fig. 1C),  
104 yielding a useful degree of quenching (see below). The inability to cross membranes has been  
105 previously demonstrated for BHQ3 (Zhang et al. 2014), MG (Wilhelm et al. 2015) and TB (Strober  
106 2015). While all quenchers absorb excitation light at high concentrations, minimal absorption was  
107 observed at the concentrations used here (Suppl. Fig. S1).

108

#### 109 *Quenching of plasma membrane-localized FM4-64 is influenced by the extracellular matrix*

110 Despite the limited overlap with the excitation spectrum of TB (Fig. 1C), fluorescence emission of  
111 FM4-64 incorporated in giant unilamellar vesicles (GUVs) gradually decreased in the presence of TB  
112 (Fig. 2A, B), demonstrating its potential in this experimental system. To test how quenching is  
113 influenced by the extracellular matrix, we compared quenching efficiency and quenchable fraction in  
114 GUVs, [Human embryonic kidney 293 \(HEK\)](#), *Escherichia coli* and *S. cerevisiae* cells labeled with  
115 FM4-64. The amphiphilic nature of FM4-64 means that it has a high affinity to the nonpolar  
116 phospholipid bilayer, while its charged group prevents the dye molecule from crossing the membrane  
117 (Griffing 2008; Wu et al. 2009). Importantly, FM4-64 does not bind to cell walls. Plasmolysis  
118 experiments on onion epidermis cells showed FM4-64 to be exclusively present in the plasma

119 membrane (Suppl. Fig. S2). Since FM4-64 can be internalized via endocytosis, measurements were  
120 restricted to 5 min after application of the dye, during which time only the plasma membrane is labeled  
121 (Vida and Emr 1995; Bolte et al. 2004).

122 In all cases, addition of TB resulted in quenching of FM4-64 fluorescence (Fig. 2C-E). To estimate the  
123 quenching efficiency and accessibility of FM4-64 to TB, fluorescence quenching data were analysed by  
124 the Stern-Volmer equation (Equation 1) and by the modified Stern-Volmer equation (Equation 2)  
125 (Lehrer 1971). In HEK cells, quenching efficiency and quenchable fraction were similar to GUVs (Fig.  
126 2F-I). In the bacterial and yeast cells, efficiency and quenchable fraction were significantly lower (Fig.  
127 2F-I). The results demonstrate a lower accessibility of the plasma-membrane localized fluorophore in  
128 cells containing a cell wall.

129

### 130 *Relationship of quenching efficiency and cell wall structure*

131 After establishing that cell walls affect the quenching of plasma membrane-localized FM4-64, the  
132 relationship of cell wall structure and quenching efficiency was further investigated. Quenching  
133 experiments were performed on the root elongation zone of seedlings of Arabidopsis plants treated with  
134 chemicals known to affect cell wall structure as well as mutants with published cell wall phenotypes.  
135 The mutants have reduced amounts, or lack, one or more polysaccharide component of the cell wall  
136 (Table 1). Chemicals included the cellulose synthesis inhibitors 2, 6-dichlorobenzonitrile (DCBN) and  
137 isoxaben and the growth inducing polyethylene glycol (PEG; also used to simulate drought stress  
138 below). Experiments were conducted on epidermal cells, since these define organ morphology  
139 (Savaldi-Goldstein et al. 2007) and are accessible to dyes. In each experiment, FM4-64 staining was  
140 performed for less than 10 min to ensure that only the plasma membrane was labeled. It should be  
141 noted that the quenching assay is not only applicable to roots, but also works on other plant tissues for  
142 example maize leaves (Suppl. Fig. S3).

143 Differences were observed between the three different quenchers (Fig. 3). In each plant, MG yielded  
144 the highest quenching efficiency and BHQ3 the lowest, with TB falling in between (Fig. 3B). All  
145 mutants showed a reduction in quenching efficiency with TB and BHQ3 compared to wild-type plants,  
146 although the reduction was only significant for *cesa3<sup>S211A</sup>*, *roll* and *xxt1xxt2* (Fig. 3B). In contrast,  
147 quenching with MG did not show decreased efficiency in the *xxt1xxt2* mutant and even increased in the  
148 *cesa3<sup>S211A</sup>* mutant (Fig. 3B). Exposure of roots to the three chemicals increased quenching efficiency

149 with all quenchers with the same order of efficiency  $MG > TB > BHQ3$  as observed in the cell wall  
150 mutants (Fig. 3B). These results suggest that quenching efficiency depends on quencher size as the  
151 smaller MG can quench more efficiently and is not hindered by the structural changes in the *xt1xt2*  
152 and *cesa3<sup>S211A</sup>* mutants that affect penetration of the bigger BHQ3 and TB (see Fig. 1 for size  
153 comparison of quenchers).

154 To further investigate how quenching efficiency relates to cell wall structure, we evaluated cellulose  
155 spacing of wild-type, mutants and chemical-treated plants by staining the roots with the cellulose-  
156 specific dye Pontamine Fast Scarlet 4B (S4B) (Anderson et al. 2010; Liesche et al. 2013). With the  
157 intensity of cellulose fibrils normalized among all images, differences in cellulose fibril density become  
158 apparent (Fig. 3C). These were quantified as histogram mean values of 2D projections of image stacks  
159 acquired throughout the cell wall. Lower mean values indicate a higher abundance of black pixels, i.e.  
160 spaces between cellulose fibrils. Plants treated with the cellulose synthesis inhibitors DCBN or  
161 isoxaben showed lower cellulose density compared to control plants and, accordingly, reduced mean  
162 values (Fig. 3C). Cell wall mutants, such as *roll* showed an increased mean value and visible  
163 differences in the pattern of cellulose distribution (Fig. 3C). Histogram mean value was found to  
164 significantly correlate with quenching efficiency for all three quenchers (Fig. 3D).

165 The correlation of quenching efficiency with cellulose spacing was further corroborated by Atomic  
166 force microscopy (AFM) imaging of epidermal cells corresponding to those used in the quenching  
167 experiments. AFM images of the *cesa3<sup>S211A</sup>* mutant indicate a change in spacing of cellulose compared  
168 to wild-type (Fig. 4). Whereas in the wild-type wall, thick cellulose bundles with relatively large spaces  
169 in between were evident (Fig. 4A), a tight network of thin cellulose fibrils was observed in the  
170 *cesa3<sup>S211A</sup>* mutant (Fig. 4B). A similar difference has been observed in the epidermal cell walls of wild-  
171 type and the *xt1xt2* mutant (Xiao et al. 2016). Whether a high number of small pores in the *cesa3<sup>S211A</sup>*  
172 mutant is responsible for the significantly increased MG quenching efficiency cannot be confirmed or  
173 excluded based on the AFM images.

174 In contrast, no indication for a correlation of cell wall thicknesses, measured on transmission electron  
175 | microscopy (TEM) images, and quenching efficiency was found (Fig. 5). The walls of mutants *mur11*  
176 | and *xt1 xt2* were significantly thicker than those of wild-type plants, whereas walls of *roll* were  
177 | significantly thinner (Fig. 5). ~~These results do not correlate with quenching efficiencies (Fig. 5A).~~ For  
178 | example, *roll* had a lower quenching efficiency but a thinner wall. The *cesa3<sup>S211A</sup>* mutant showed

179 strong differences in quenching efficiency, but its wall thickness was not significantly different from  
180 wild-type. The results strongly suggests that quenching efficiency depends on cell wall porosity, and  
181 can, therefore, be used as indicator for this parameter.

182 It should be noted that, for TB quenching, changes in the quenchable fraction were also tested but did  
183 not show significant differences (Suppl. Fig. S4), which is why only quenching efficiencies are  
184 considered in the following. Furthermore, only TB was used in follow-up experiments as it offered the  
185 highest dynamic range of the three quenchers based on the experiments conducted on cell wall mutants.  
186

### 187 *Correlation of cell wall porosity and cell length in plants*

188 The mutant plants described above, as well as additional mutants that were tested (Table 1), all had  
189 significantly reduced root lengths (Suppl. Fig. S4), indicating that reduced cell wall porosity might  
190 correlate with reduced wall extensibility and cell elongation, a connection that has been debated for a  
191 long time in the plant science community (BidhendiBindhendi and Geitman 2016; Cosgrove 2016). To  
192 test this hypothesis, we induced cell extension by exposing wild-type and mutant plants to simulated  
193 drought stress, namely growth on 10 or 20% (w/v) PEG, and determined quenching efficiencies (Fig.  
194 6).

195 In wild-type plants, quenching efficiency increased upon PEG treatment (Fig. 4C), indicating an  
196 increase in wall porosity. As expected cell length and root length increased with PEG concentration  
197 (Fig. 6D, E). Regarding the cell wall mutants, a PEG-induced increase in quenching efficiency was  
198 observed in the *cesa3<sup>S211A</sup>* and the *mur10* mutants, as well as an increase in cell and root length (Fig.  
199 6A-E). A significant reduction of quenching efficiency was observed in the *mur1*, *mur11* and *roll*  
200 mutants (Fig. 6C). For all plants that showed a reduction or no significant change in quenching  
201 efficiency, no significant PEG-induced increase in cell length was observed (Fig. 6A, D). However, in  
202 case of *mur1* and *mur11* root length still increased (Fig. 6B, E).

203 A correlation analysis was conducted using the data from wild-type and mutants under control and  
204 PEG-treatment conditions to test if quenching efficiency scales with cell length and root length. The  
205 analysis of absolute values (Suppl. Fig. S4) showed a significant correlation of cell length and  
206 quenching efficiency ( $R=0.45$ ,  $P=0.0272$ ,  $n=24$ ) (Fig. 6F). Even higher significance was observed  
207 when testing correlation of relative quenching efficiency and relative cell length ( $R=0.565$ ,  $P=0.0127$ ,  
208  $n=16$ ) (Fig. 6G). A correlation of quenching efficiency with root length was only found when

209 comparing relative changes ( $R=0.436$ ,  $P=0.035$ ,  $n=16$ ). As expected, cell length showed a very strong  
210 correlation with root length ( $R=0.677$ ,  $P=0.0003$ ,  $n=24$ ) (Fig. 6H). The results support the notion of cell  
211 wall porosity being related to wall elasticity and, thereby, cell elongation. However, rather than being a  
212 pre-condition for cell elongation, increased porosity seems to be a consequence.

213

#### 214 *Cell wall porosity and drug uptake in yeast*

215 To further illustrate the potential of the quenching assay, it was used to test if cell wall porosity  
216 influences the efficiency of antifungal drugs with a target inside the cell. Previously, lipid bilayers such  
217 as the plasma membrane in yeast or outer membrane of gram-negative bacteria have been seen as the  
218 decisive barrier for the uptake of anti-bacterial or anti-fungal drugs (Lambert 2002; Mishra et al. 2007).  
219 However, it was reported that disruption of the cell wall sensitizes the yeast model *S. cerevisiae* and the  
220 infectious *Candida glabrata* to the anti-malarial drug chloroquine (Islahudin et al. 2013) indicating that  
221 cell wall structure can influence drug uptake. Here, experiments were carried out on *S. cerevisiae*,  
222 which has a similar cell wall to the infectious *Candida* strains (Gow et al. 2017).

223 Several agents known to affect yeast cell wall structure (Okada et al. 2016) were tested for their  
224 influence on cell wall porosity using the quenching assay. Cells treated with CW, 2-Deoxyglucose (2-  
225 DG), a 42°C heat shock and sodiumdodecylsulfate (SDS) were found to have a higher FM4-64  
226 quenching efficiency compared to untreated cells, indicating an increased cell wall porosity (Fig. 7A).  
227 The influence of CW, 2-DG, SDS, as well as of two known antifungal drugs with intracellular target,  
228 Amphotericin B and Voriconazole, on cell viability was tested. Amphotericin B and Voriconazole  
229 target the membrane integrity and ergosterol synthesis, respectively (ASDCD 2018). At the minimal  
230 efficient concentrations, where separate application of these compounds reduced viability after 24 h by  
231 about 50% (Fig. 7B), combinations of wall-modifying agents with Amphotericin B or Voriconazole  
232 further reduced viability, indicating a synergistic effect (Fig. 7B). Quantification of this effect showed  
233 that the efficiency of concomitant application of Amphotericin B and Voriconazole only increased by  
234 15% compared to separate applications of the two drugs (Fig. 7C). All combinations of porosity-  
235 increasing chemicals with either Amphotericin B or Voriconazole led to an increase in treatment  
236 efficiency of at least 40% (Fig. 7C). While there was no linear correlation between quenching  
237 efficiency and the synergistic effect (Fig. 7C), these results do indicate a link between cell wall  
238 structure and efficiency of drug uptake.

239 To check if the cell wall-modifying chemicals at the concentrations used for the quenching assay  
240 visibly compromise the cell wall or if they merely cause changes in the internal structure, cells were  
241 studied by field emission scanning electron microscopy (Fig. 7). Only the appearance of 2-DG-treated  
242 cells showed strong deviation from control cells (Fig. 7F). The large indentations indicate that  
243 treatment led to major defects in the cell wall, whereas CW- and SDS-treatment did not affect  
244 appearance (Fig. [7D-E,G](#)).

245

## 246 Discussion

247 The quenching assay presented here is useful for quantifying the accessibility of the extracellular  
248 quencher molecule to the plasma membrane. Furthermore, the results demonstrate that this accessibility  
249 changes according to the structure of the extracellular matrix, i.e., the cell wall. Thereby, the assay  
250 constitutes a new quantitative method to probe the structure of cell walls *in vivo*.

251 Which structural feature(s) of the cell wall determine the quenching efficiency? At least four  
252 parameters can be considered (Fig. 8). Firstly, quenching efficiency could depend on the distance  
253 between the plasma membrane and the outer boundary of the extracellular matrix. No correlation of  
254 cell wall thickness and quenching efficiency was observed for Arabidopsis seedlings, although the  
255 relatively low sample number should be considered. Nevertheless, the result is in line with the fact that  
256 quenching is limited to about 5 nm distance (Zu et al. 2017).

257 Secondly, quenching efficiency could depend on the contact area of plasma membrane and open  
258 apoplastic space. This is unlikely, because the quenching efficiency showed large differences between  
259 wild-type plants and some of the cell wall mutants, while the quenchable fraction, i.e. the amount of  
260 membrane dye that can be accessed by the quencher, did not significantly change. Furthermore, no  
261 visible differences were found between the plasma membrane-adjacent wall region of wild-type and  
262 *xxt1 xxt2* mutant cells (Xiao et al. 2016).

263 Thirdly, the quenching efficiency might depend on the spacing between wall components, i.e. the  
264 molecular diffusion efficiency inside the cell wall. The comparison of quenching efficiency  
265 measurements with TEM and AFM images of the cell walls of wild-type and mutant plants supports  
266 this hypothesis. The walls of *cesa3*<sup>S211A</sup> and *xxt1 xxt2* mutants, which had a decreased quenching  
267 efficiency, both have a denser appearance than the respective walls wild-type plants (Xiao et al., 2016  
268 and Fig. 4). Importantly, quenching efficiency was influenced by the size of the quencher with MG

269 showing better quenching than the larger BHQ3 and TB. TB is longer but narrower than BHQ3, which  
270 might cause the better quenching of TB compared to BHQ3 that was observed here. Charge is unlikely  
271 to influence quenching as the negative charge of the cell wall (Crasnier et al. 1985) would be expected  
272 to facilitate access of the positively charged BHQ3, but not the negatively charged TB.

273 Fourthly, quenching efficiency might depend the molecular diffusion efficiency inside the wall, like in  
274 the third hypothesis, but this would depend on the binding of quencher molecules to cell wall  
275 components instead of the availability of spaces between components. TB was previously proposed to  
276 have a moderate ability to bind beta glucans and xyloglucan (Liesche et al. 2015). However, TB  
277 quenching efficiency in the different cell wall mutants does not support this observation. For example,  
278 in the *xt1 xt2* mutant, which lacks xyloglucans (Cavalier et al. 2008, Park and Cosgrove 2012),  
279 quenching efficiency was lower than in wild-type plants. If TB diffusion was influenced by xyloglucan  
280 binding, then quenching efficiency should increase in the absence of these binding sites. Quenching  
281 efficiency was also significantly reduced in the *rol1* mutant, even though this mutant has the same  
282 levels of xyloglucan and other glucans as wild-type plants (Diet et al. 2006).

283 In conclusion, it is most likely that the primary factor determining quenching efficiency is the spacing  
284 between cell wall components, especially between cellulose fibrils. That means that it would also be a  
285 good tool to test cell wall digestibility, which has previously been linked to cell wall porosity (Adani et  
286 al. 2011; Ding et al. 2012), in the same set of mutants analyzed here or in other plants for which the  
287 quenching measurements are made. This could be highly relevant for testing, maybe even as part of a  
288 breeding program, for biomass usability (Dixon 2013). In this respect the results also suggest that  
289 reducing certain cell wall components, at least in the primary wall, cannot be expected to be a good  
290 strategy for increasing digestibility, because decreased wall porosity might be a general response. This  
291 could explain why genetically modifying plants with increased expression of cell wall modifying  
292 enzymes sometimes does not have a beneficial effect for digestibility (Tavares 2015).

293 The potential of the quenching assay was illustrated by using it to investigate changes in wall porosity  
294 during drought-induced cell elongation in the model plant *A. thaliana* [Arabidopsis](#). Root elongation is  
295 an important part of a plant's drought response, as it enables access to residual water in the soil. It is  
296 achieved through a combination of higher cell division rates and cell elongation (Comas et al. 2013).  
297 Cell elongation depends on remodeling of the cell wall, and drought-induced wall remodeling is known  
298 to be enacted by enzymes that modify wall polysaccharides, especially expansins, xyloglucan

299 endotransglucosylases/hydrolases and pectin esterases (Tenhaken 2015, Lampugnani et al. 2018). The  
300 question of how cell wall structure relates to wall mechanics and action of cell wall-loosening agents is  
301 seen as the “grand challenge” in the field of cell wall biology (Cosgrove 2016). Results of the  
302 quenching assay provide some insight on this, by demonstrating that cell wall porosity changes during  
303 wall remodeling. The occurrence of stress-induced cell elongation in mutants with strongly decreased  
304 wall porosity indicated that increased porosity is not a pre-condition for elongation but a consequence.  
305 This was supported by the higher significance of correlation of quenching efficiency and cell length  
306 relative to non-stressed conditions compared to the correlation of absolute values of the two  
307 parameters.

308 The results suggest the following to happen: stress-induced loosening of the cell wall is accompanied  
309 by an increased physical distance between wall components or the removal of certain materials  
310 between load-bearing components. In the cell-wall mutants that are not able to remodel their cell walls  
311 in response to stress, cell wall-modifying enzymes can be present in the wall, but the lack/reduction of  
312 certain wall components prevents their action. These results could be extended by analyzing plants with  
313 altered amounts of cell wall modifying enzymes, coupled with a detailed chemical analysis of cell wall  
314 composition and crosslinking. Facilitated by the non-invasiveness the assay could thereby help to find  
315 the genetic basis of the adaptation of cell wall structure to environmental conditions. In addition,  
316 facilitated by the simplicity of the quenching assay, key genes controlling cell wall remodeling could  
317 be identified via forward genetics screening or through a genome wide association study.

318 The quenching assay presented here could also be used for chemical screens that aim to identify  
319 compounds that alter the cell walls of bacteria or fungi, and thus have relevance for biomedical and  
320 biotechnology research. This was illustrated here by testing porosity of yeast cells in the presence of  
321 cell wall-modifying agents and linking these results to uptake of common antifungal drugs with intra-  
322 cellular targets. While results clearly demonstrate a synergistic effect due to modification of cell wall  
323 structure, it is not clear if there is a correlation with porosity or if the effect is due to other effect. For  
324 example, it might be possible that destabilizing the cell wall affects the plasma membrane and  
325 facilitates uptake or action through this. Investigation on a larger scale would be needed to determine  
326 the full potential of cell wall-modifying agents for anti-fungal drug treatment.

327

## 328 **Material and methods**



329 *Materials*

330 The lipid 1,2-dioleoyl-*sn*-glycero-3-phosphocholine (DOPC) was purchased from Avanti Polar Lipids  
331 (Alabaster, Alabama, USA). N-(3-Triethylammoniumpropyl)-4-(6-(4-(Diethylamino) Phenyl)  
332 Hexatrienyl) Pyridinium Dibromide (FM4-64), Bodipy FL and CW were purchased from  
333 ThermoFisher Scientific (Waltham, MA, USA). TB was purchased from Merck Millipore (Darmstadt,  
334 Germany), Basic Fuchsin from SigmaAldrich (St. Louis, Missouri, USA) and SDS, MG, 2-DG, PEG  
335 (MW 8000), isoxaben and DCNB from Solarbio (Beijing, China). BHQ3 was purchased from LGC  
336 Biosearch (Petaluma, CA, USA). Phosphate-buffered saline (PBS) contained 130 mM NaCl, 2.6 mM  
337 KCl, 7 mM Na<sub>2</sub>HPO<sub>4</sub>, 1.2 mM KH<sub>2</sub>PO<sub>4</sub>, and was adjusted to pH 7.4. Phosphate buffer (PB) with pH 5.8  
338 was adjusted obtained by mixing by 0.2 M NaH<sub>2</sub>PO<sub>4</sub> and 0.2 M Na<sub>2</sub>HPO<sub>4</sub> with the volume ratio of 23:2  
339 and then diluted to a concentration to 40 μM. PB with pH 6.8 was adjusted obtained by mixing  
340 by the two kinds of stock solutions with the volume ratio of with a ratio of 51:49. Tyrodes balanced  
341 salt solution (TBSS) contained 136 mM NaCl, 2.6 mM KCl, 1.8 mM CaCl<sub>2</sub>, 1 mM MgCl<sub>2</sub>, 0.36 mM  
342 NaH<sub>2</sub>PO<sub>4</sub>, 5.56 mM D-Glucose, and 5 mM HEPES, and was adjusted to pH 7.4.

343

344 *Electroformation of giant unilamellar vesicles*

345 GUVs were produced by an electrophysical method (Angelova et al. 1992) as described in the  
346 following. DOPC was dissolved in chloroform to a final concentration of 0.5 mg/mL in a volume of 50  
347 μL in pointy Schott glass tubes. Five μL of the mixture was placed in small drops on both electrodes  
348 and the chloroform dissipated by vacuum application for 15 min. The electroformation chamber was  
349 filled with 300 μL sterile-filtered 300 mM sucrose solution. Vesicle formation was achieved by  
350 applying an AC voltage, 20 mV and 10 Hz, for 3 h followed by 1 h at 2 V and 4 Hz. The GUVs (20  
351 μL) were transferred on a microscope slide, and the same amount of PBS or quencher solution was  
352 added. GUVs were allowed to settle on the slide for 3 min. The quality of GUVs was checked using  
353 phase contrast microscopy.

354

355 *Cell cultures and plant cultivation*

356 *E. coli* (DH5α) cells were grown at 37°C in Luria-Bertani liquid medium for 4 h. Bacteria were  
357 collected from 1 mL medium, washed with 1 mL PBS and incubated with 100 μL PBS-based FM4-64

358 solution for 5 min. After washing with 1 mL PBS, cells were mixed with 10  $\mu$ L quencher solutions on  
359 the slide and immediately analyzed under the microscope.

360 Yeast (*S. cerevisiae*) cells of the strain BY4742 were cultured in yeast extract peptone dextrose  
361 medium (1% yeast extract, 2% peptone, 2% glucose/dextrose, water) at 30°C For labeling with FM4-  
362 64, cells in 3 mL medium were grown to mid-logarithmic phase (OD<sub>600</sub> ~ 0.6–0.8), washed with PBS  
363 and suspended in 200  $\mu$ L PBS-based FM4-64 solution for 3 min, followed by washing and imaging.  
364 Cells were used within 10 min. For the induction of changes in the yeast cell wall, 5  $\mu$ g/mL CW, 0.02%  
365 (w/v) 2-DG or 0.04 mg/mL SDS were added to the medium 2 h before quenching experiments were  
366 conducted.

367 | ~~Human embryonic kidney 293 (HEK)~~ cells were maintained in Dulbecco's Modified Eagle Medium  
368 (Invitrogen, CA, USA) supplemented with 10% fetal bovine serum at 37°C in 5% CO<sub>2</sub>. For labeling  
369 with FM4-64, cells were trypsinized using 0.25% trypsin-EDTA for 5 to 10 min and resuspended in  
370 TBSS. Cells were used for quenching assays within 1 h.

371 | Arabidopsis (~~Arabidopsis thaliana~~) ecotype Columbia (Col-0), and the homozygous mutants *kor*  
372 (N298), *mur1* (N6244), *mur10* (N8578), *mur11* (N8579), *xxt1 xxt2* (N16349), *roll* (N16373) (all  
373 obtained from the Nottingham Arabidopsis Stock Center) and CESA3<sup>S211A</sup> (Chen et al., 2016) were  
374 used in this study. Mutants were selected to represent different types of changes in cell wall  
375 composition and structure. After surface sterilization with 10% (v/v) sodium hypochlorite for 10 min

376 | ~~and followed with by~~ vernalization ~~for at least 3 days at 4 °C~~, seedlings were grown on half-strength  
377 Murashige and Skoog (MS) plates containing 0.22% (w/v); MS salts (Phyto Technology Laboratories,  
378 China), 1% (w/v) sucrose and 0.8% (w/v) agar powder (Solarbio, China), pH 5.8, under 16 h light/8 h  
379 dark in a growth chamber at 22°C. For drought treatment 3-d-old seedlings were transplanted from  
380 normal half-strength MS plates to plates containing either 10% or 20% (w/v) PEG for 4 days. For  
381 treatment with the cellulose synthesis inhibitors DCBN (Desprez et al., 2002) and isoxaben (Tateno et  
382 al., 2016), 6-d-old Columbia seedlings grown on half-strength MS plates were transferred to plates  
383 containing 5 nM isoxaben or 0.5  $\mu$ M DCBN. After one day incubation in the growth chamber with 16 h  
384 light/8 h dark cycle at 22°C, seedlings were used for the quenching assay and cell wall structure  
385 analysis.

386

387 *Quenching assay and imaging*

388 FM4-64, from a 1 mM DMSO stock, was used at final a concentration of 50  $\mu\text{M}$  for staining of GUVs,  
389 yeast and HEK cells, and at a concentration of 20  $\mu\text{M}$  for staining plant cells. Stock solutions with  
390 different concentrations of BHQ3, ~~MG~~ and TB were made by dissolving the quenchers in PBS, ~~MG~~  
391 ~~was dissolved by~~ in PB. From these quencher solutions, 20  $\mu\text{L}$  were added to the GUVs/cells and 50  $\mu\text{L}$   
392 were added to the plant seedlings on the microscope slide to final concentrations ranging from 1 to 100  
393  $\mu\text{M}$ . After addition of quencher, samples were imaged immediately using a wide-field fluorescence  
394 microscope (DMi8, Leica Microsystems, Germany) for GUV experiments or a confocal microscope  
395 (Andor Revolution XD, Leica SP8 or a point scanning confocal system equipped with CLSD-2SS  
396 Dual-Channel PMT Module (Thorlabs, USA) on a Leica DMi8 microscope body. ~~Thorlabs confocal~~  
397 module) for experiments involving cells and plants. 1.49 N.A. 100 $\times$  oil immersion objectives with N.  
398 A. 1.3 to 1.49 were used for GUV, bacteria, yeast and HEK cell imaging and a 1.10 N.A. 40 $\times$  water  
399 immersion objective ~~were~~ was used for plant cells. Imaging parameters for FM4-64 were excitation at  
400 530 to 550 nm and emission detection at 560 to 620 nm on the wide-field system, and excitation at 514  
401 nm, 532 nm or 543 nm and emission detection detected under a TR-Fat 570 to 616 or 550 to 610 nm at  
402 560 to 620 nm on the confocal microscopes. Software supplied by the microscope manufacturers was  
403 used for image acquisition.

404 For each sample, the quenching assay was repeated at least three times, including the entire  
405 concentration range. As there was no significant variation between the data from different replicates, all  
406 data from each sample were pooled and analyzed together. While different intensity values were  
407 obtained from experiments performed using different confocal microscopes, there were no significant  
408 differences in quenching efficiency or quenchable fraction.

#### 409 Absorption and Emission spectrum measurements

410 Absorption ~~and emission~~ scans were performed with a ~~Tecan~~ Infinite 200 Pro fluorescence  
411 spectrometer (Tecan, Switzerland) with the PBS-based solution at the concentration of 100  $\mu\text{M}$ . CW,  
412 Basic Fuchsin and Bodipy FL were all used at a concentration of 10  $\mu\text{g mL}^{-1}$  and mixed with TB right  
413 before conducting the measurement. The optimal excitation and emission parameters used in these tests  
414 were determined in separate wavelength scans for each dye.

415

416

417 *Image analysis and calculation of quenching efficiency*

418 All image analysis was performed in ImageJ (Schindelin et al. 2012). In order to correct for  
 419 background, signal in an area of each image where no GUVs or cells were present was measured. The  
 420 black level of the image was assigned to this value and the remaining signal values were redistributed  
 421 between 1 and 255 using the brightness & contrast tool. Then, fluorescence intensity was measured by  
 422 determining the average intensity of a 3  $\mu\text{m}$   ~~$\times$~~  5  $\mu\text{m}$  region of interest (ROI) overlaid on the  
 423 peripheral staining of each GUV or cell (Suppl. Fig. S5). The ROI size was reduced to 1  $\mu\text{m}$   ~~$\times$~~  2  $\mu\text{m}$   
 424 for *S. cerevisiae* cells and 0.5  $\mu\text{m}$   ~~$\times$~~  0.5  $\mu\text{m}$  for bacteria. In plant cells, ROI width was kept constant,  
 425 while ROI length varied in relation to the in-focus area of plasma membrane (Suppl. Fig. S5).  
 426 Intensity values were transferred to Excel (Microsoft, WA, USA) and quenching efficiency and  
 427 fraction of quenchable fluorophores were calculated according to the equations presented below.  
 428 Quenching processes are generally described by the Stern-Volmer equation, which specifies the  
 429 quenching efficiency,

$$\frac{F_0}{F} = 1 + K[Q] \quad \text{Eq. 1}$$

430 where  $F_0$  and  $F$  are the fluorescence intensity in the absence and presence of quencher at the  
 431 concentration  $Q$ , respectively, and  $K$  is the quenching coefficient. In addition to quenching efficiency,  
 432 the fraction of quencher-accessible fluorophores is used to characterize a quenching process. In order to  
 433 determine the quenchable fraction of fluorophores, the Stern-Volmer equation (Eq. 1) can be modified  
 434 to quantify the portion of fluorophores that are accessible for quenching,  $f_a$ , according to Lehrer (1971).

$$\frac{F_0}{\Delta F} = \frac{1}{f_a} \times \frac{1}{K[Q]} + \frac{1}{f_a} \quad \text{Eq. 2.}$$

435 where  $\Delta F$  is the change in fluorescence intensity through quenching. Accordingly plotted,  $1/f_a$  of a  
 436 quenching experiment is given as the point of intersection with the y-axis.

437 Standard deviations were provided as error bars for all average values. The standard deviation of linear  
 438 regressions was determined according to  $SD = \frac{b}{R\sqrt{\frac{(n-2)}{1-R^2}}}$ , with quenching efficiency  $b$ , R-value of the fit

439  $R$  and the number of experiments  $n$ . Welch's t-test was used to determine significance.

440 Relative quenching efficiencies were calculated by dividing values from experiments conducted under  
 441 stress conditions with those conducted under control conditions.

442

443 *Analysis of cellulose fibril spacing by confocal imaging*

444 Roots ~~of 7-d-old Arabidopsis seedlings~~ were stained with 10 µg/mL S4B for 10 min and washed with  
445 PBS (~~pH 7.2~~) before imaging on ~~a spinning-disk confocal system (Revolution WD, Andor, UK)~~  
446 ~~equipped with a CSU-W1 spinning-disk head (Yokogawa, Japan) and an iXon Ultra 888 EMCCD~~  
447 ~~(Andor, UK) a spinning disc confocal microscope (Revolution WD, Andor, UK)~~. Using the ~~HXC PL~~  
448 ~~Apo 100x N.A. 1.49~~ objective, 561 nm laser, and ~~a TR-F607/36 bandpass filter (Semrock BrightLine,~~  
449 ~~USA)s allowing detection at 575 to 625 nm~~, z-stacks of the outer wall of epidermis cells were acquired.  
450 Image stacks were deconvolved using the Huygens software (~~Version 15.10, Scientific Volume~~  
451 ~~Imaging, Netherlands)~~ with the default settings ~~using an automatically generated theoretical point~~  
452 ~~spread function and the maximum likelihood estimator algorithm~~. Maximum projections were made  
453 from deconvolved image data in ImageJ. On these, the white level was adjusted so that the brightest  
454 cellulose fibrils of the outer wall are assigned the maximum value (= 65535 for the 16-bit images). The  
455 black level was left unchanged. Thereby, differences in signal intensity between samples were  
456 eliminated, ensuring that darker areas indicate reduced presence of cellulose. Rectangular ~~regions of~~  
457 ~~interest ROIs~~ were drawn on the in-focus areas of the outer epidermal wall and mean values determined  
458 using ImageJ's histogram function. At least 6 cells were measured for each sample.

459

460 *Fluorescence lifetime measurement*

461 Fluorescence lifetime imaging was performed on a Microtime 200 laser scanning confocal (PicoQuant,  
462 Germany). Bodipy FL was excited at 485 nm and fluorescence emission was detected at 500 to 525 nm  
463 by a photon-counting hybrid photomultiplier detector. Electrical signals were processed by a time-  
464 correlated single photon counting module (PicoQuant, HydraHarp 300). Analysis of FLIM images was  
465 performed using the SymPhoTime 64 software (PicoQuant, Germany), taking into account the  
466 instrument response function. Bodipy FL showed a single exponential decay. Time of photon arrival  
467 data is represented without fitting to a mathematical model. In these data, maximum peak height  
468 represents the fluorophore's lifetime under the given conditions.

469

470 *Atomic force microscopy*

471 Three-day-old dark-grown seedlings were bisected longitudinally and incubated in 2 M KOH at room  
472 temperature for 1 h and then in 1% Tween 20 for 30 min. After washing with ddH<sub>2</sub>O until pH 7.0 was

473 reached, slices were placed between glass slides and a load of 5 g applied for 5 min. The innermost  
474 wall layer of primary cell walls was examined by scanning probe atomic force microscope (Bruker  
475 MultiMode V with NanoScope V Controller and SCANSYST-AIR probe). Contact AFM was  
476 performed in air at room temperature. Images of 2  $\mu\text{m}^2$  size with 512 x 512 pixel resolution were  
477 recorded using the software NanoScope Analysis ([v1Version 1.10](#), Bruker, MA, USA). At least five  
478 areas per cell were scanned and at least six cells from three samples were analyzed.

479

#### 480 *Transmission electron microscopy*

481 Whole, 7-day-old seedlings were vacuum infiltrated with 2.5% glutaraldehyde at 4°C for 6 h. After  
482 pre-fixing, the samples were gently rinsed with PBS solution (pH 6.8) for 4 times, 15 min each.  
483 Samples were fixed with 1% osmic acid at room temperature for 4 h followed by 3 times rinsing, 10  
484 min each. The procedure of dehydration and infiltration with LR White resin was carried out as  
485 described by Verhertbruggen et al. (2017). After complete polymerization in capsules in the absence of  
486 oxygen, at 55°C, the root elongation zone of LR White embedded material were sectioned transversely  
487 with a diamond knife mounted on a Leica UC7 ultramicrotome to obtain ultra-thin sections of 70 nm of  
488 thickness. After transfer to copper grids, samples were stained with uranyl acetate for 20 min and  
489 gently rinsed with double-distilled water (ddH<sub>2</sub>O). Then, samples were counterstained with lead citrate  
490 for 10 min, rinsed with ddH<sub>2</sub>O and, after drying for 2 days, TEM images captured using a JEOL JEM-  
491 1230 under a voltage of 80 kV. Image files were analyzed by ImageJ to measure the thickness of the  
492 cell walls.

493

#### 494 *Yeast viability assay*

495 Yeast cells of the strain BY4742 were cultured in yeast extract peptone dextrose medium at 30 °C in  
496 the presence of either CW (0.25  $\mu\text{g}/\text{mL}$ ), 2-DG (0.01 % (w/v)), SDS (2  $\mu\text{g}/\text{mL}$ ), Amphotericin B (0.5  
497  $\mu\text{g}/\text{mL}$ ) or Voriconazole (0.25  $\mu\text{g}/\text{mL}$ ) or combinations of two of these substances. Every 2 h samples  
498 were taken, from which cell counts were determined using a hemocytometer. The data was analyzed  
499 using Microsoft Excel. Each assay was repeated three times. The synergistic effect was quantified as  
500 the average number of cells in culture after 24 h cultivation in the presence of two substances divided  
501 by the average number of cells of each treatment alone.

502

503 *Field-emission scanning electron microscopy*

504 Yeast cells were cultured as described above. For the different pretreatments 5 µg/mL CW, 0.04  
505 mg/mL SDS or 0.02% (w/v) 2-DG were added 2 h before fixation. Cells were fixed in 4%  
506 glutaraldehyde at 4°C for 4 h followed by gradient dehydration in eight steps. Critical-point drying was  
507 performed using a Leica EM CPD300 ([Leica Microsystems, Germany](#)) in automatic mode. Dried  
508 samples were immobilized on double-sided carbon tape on a SEM sample stage and coated with Pt  
509 using a Quorum Q150T sputter coater ([Quorum, UK](#)) at 30 mA for 80 sec. Images were acquired using  
510 a FEI Nova Nano SEM-450 ([FEI, USA](#)) at a magnification of at least 10000 times with an in-lens  
511 detector at 5 or 10 kV. Images were analyzed with Image J (Schindelin et al. 2012).

512

513 *Statistical analysis*

514 Welch's two-sided t-test was used to assess significance of difference between data points. A  
515 difference was considered significant when  $P < 0.05$ . Data distribution was assumed to be normal but  
516 this was not formally tested. Pairwise Pearson Product Moment correlation was performed in  
517 SigmaPlot (Version 12.5, Systat Software, CA, USA). A correlation was considered significant when  $P$   
518  $< 0.05$ .

519

520 *Supplemental material*

521 Suppl. Fig. S1 complements Fig. 1 by providing further details on the properties of different quenchers.  
522 The correlation of quenching efficiency with spectral overlap of quencher absorption and dye emission  
523 (Suppl. Fig. S1) supports the hypothesis that Trypan Blue quenching is based on Förster Resonance  
524 Energy Transfer. Suppl. Fig. S2 provides an image from plasmolysis experiments performed on onion  
525 epidermis cells stained with FM4-64, indicating that the dye is associated with the plasma membrane  
526 and not the cell wall. Suppl. Fig. S3 illustrates the applicability of the quenching assay to plant leaves.  
527 Suppl. Fig. S4 provides quenchable fractions and quenching efficiencies in the various cell wall  
528 mutants used in this study, thereby complementing the information provided in Fig. 3 and Fig. 6.  
529 Suppl. Fig. S5 shows how the measurement regions to quantify fluorescence intensity were defined on  
530 different types of samples.

531

532

533 **Acknowledgements**

534 Imaging was performed at the Center for Advanced Bioimaging Denmark and Life Science Research  
535 Core Services of Northwest A&F University. TGP acknowledges support from the Villum Foundation  
536 (project grant number 022868). JL acknowledges support from the National Science Foundation China  
537 (project grant number 31700313) and the Science Foundation of Shaanxi Province (100 Talent  
538 Program). We thank Daniel Cosgrove and Charles T. Anderson (Penn State University) for critical  
539 discussion and helpful comments on the manuscript. The authors declare no competing financial  
540 interests.

541

542 **Author contributions**

543 Thomas Günther Pomorski<sup>GP</sup> and Johannes Liesche devised the quenching assay and control  
544 experiments. Xiaohui Liu<sup>XL</sup> and Johannes Liesche devised the experimental plan for plant cell wall  
545 analysis. Johannes Liesche<sup>L</sup> performed fluorescence lifetime microscopy and conducted the quenching  
546 experiments on vesicles and mammalian cells. Xiaohui Liu conducted quenching experiments on  
547 bacteria, yeast and plants, and measured cellulose fibril spacing and yeast viability. Xiaohui Liu and  
548 Jiazhou Li<sup>LJ</sup> performed the electron microscopy. Shaolin Chen, ~~and Heyu Zhao and~~, Boyang Liu  
549 performed the atomic force microscopy. Johannes Liesche<sup>JL</sup> wrote the manuscript with support of all  
550 authors.

551

552

553

554 **References**

555

556 Adani, F., Papa, G., Schievano, A., Cardinale, G., D'Imporzano, G., & Tambone, F. Nanoscale  
557 Structure of the Cell Wall Protecting Cellulose from Enzyme Attack. *Environ. Sci. Tech.* 45, 1107-  
558 1113 (2011).

559 Anderson, C.T., Carroll, A., Akhmetova, L., Somerville, C. Real-time imaging of cellulose  
560 reorientation during cell wall expansion in Arabidopsis roots. *Plant Physiol.* 152, 787-796 (2010).



561 Angelova 1992, M., Soleau, S., Meleard, P., Faucon, J. F., & Bothorel, P. *Prog. Colloid. Polym. Sci.*  
562 89, 127–131 (1992).

563 ASDCD: Synergistic drug combination DataBase. <http://asdcd.amss.ac.cn/>; last accessed 20. October  
564 2018.

565 Austin, R.S., Vidaurre, D., Stamatiou, G., Breit, R., Provart, N.J., Bonetta, D., Zhang, J., Fung, P.,  
566 Gong, Y., Wang, P.W., McCourt, P., Guttman, D.S. Next-generation mapping of Arabidopsis  
567 genes. *Plant J.* 67, 715-725 (2011).

568 Bidhendi A.J., & Geitmann A. Relating the mechanics of the primary plant cell wall to  
569 morphogenesis. *J. Exp. Bot.* 67, 449-461 (2016).

570 Boaneres, D., Ferreira, B.G., Kozovits, A.R., Sousa, H.C., Isaias, R.M.S., Franca, M.G.C. Pectin and  
571 cellulose cell wall composition enables different strategies to leaf water uptake in plants from  
572 tropical fog mountain. *Plant. Physiol. Biochem.* 122,57-64 (2018).

573 Bolte, S., Talbott, C., Boutte, Y., Catrice, O., Read, N.D., & Satiat-Jeunemaitre, B. FM-dyes as  
574 experimental probes for dissecting vesicle trafficking in living plant cells. *J. Microscopy.* 214,159–  
575 173 (2004).

576 Bosca, S., Barton, C. J., Taylor, N. G., Ryden, P., Neumetzler, L., Pauly, M., Roberts, K., & Seifert,  
577 G. J. Interactions between MUR10/CesA7-dependent secondary cellulose biosynthesis and primary  
578 cell wall structure. *Plant Physiol.* 142, 1353-1363 (2006).

579 Brown, E. D., & Wright, G. D. Antibacterial drug discovery in the resistance era. *Nature.* 529, 336-  
580 343 (2016).

581 Burnham-Marusich, A. R., Hubbard, B., Kvam, A. J., Gates-Hollingsworth, M., Green, H. R.,  
582 Soukup, E., Limper, A. H., & Kozel, T. R. Conservation of Mannan Synthesis in Fungi of the  
583 Zygomycota and Ascomycota Reveals a Broad Diagnostic Target. *mSphere.* 3, (2018).

584 Burton, R. A., Gidley, M. J., & Fincher, G. B. Heterogeneity in the chemistry, structure and function  
585 of plant cell walls. *Nature Chem. Biol.* 6, 724-32 (2010).

586 Carroll, A., & Somerville, C. Cellulosic Biofuels Annual Review of Plant Biology. Annual Review of  
587 Plant Biology, vol 60. *Annual Reviews, Palo Alto*, p 165-182 (2009).

588 Cavalier, D. M., Lerouxel, O., Neumetzler, L., Yamauchi, K., Reinecke, A., Freshour, et al.  
589 Disrupting two Arabidopsis thaliana xylosyltransferase genes results in plants deficient in  
590 xyloglucan, a major primary cell wall component. *Plant Cell.* 20, 1519-1537 (2008).

591 Chen, S. L., Jia, H. L., Zhao, H. Y., Liu, D., Liu, Y. M., Liu, B. Y., Bauer, S., & Somerville, C. R.  
592 Anisotropic Cell Expansion Is Affected through the Bidirectional Mobility of Cellulose Synthase  
593 Complexes and Phosphorylation at Two Critical Residues on CESA3. *Plant Physiol.* 171, 242-250  
594 (2016).

595 Comas, L. H., Becker, S. R., Cruz, V. V., Byrne, P. F., & Dierig, D. A. Root traits contributing to  
596 plant productivity under drought. *Front. Plant Sci.* 4, 16 (2013).

597 Cosgrove, D. J. Loosening of plant cell walls by expansins. *Nature.* 407, 321-326 (2000).

598 Cosgrove, D. J. Plant cell wall extensibility: connecting plant cell growth with cell wall structure,  
599 mechanics, and the action of wall-modifying enzymes. *J. Exp. Bot.* 67, 463-476 (2016).

600 Crasnier, M., Moustacas, A-M. & Ricard, J. Electrostatic effects and calcium ion concentration as  
601 modulators of acid phosphatase bound to plant cell walls. *Eur. J. Biochem.* 151, 187-190 (1985).

602 Crisalli, P., & Kool, E.T. Multi-path quenchers: efficient quenching of common fluorophores.  
603 *Bioconjugate chemistry.* 22, 2345-2354. (2011).

604 De Nobel, J. G., Klis, F. M., Munnik, T., Priem, J., & van den Ende, H. An assay of relative cell wall  
605 porosity in *Saccharomyces cerevisiae*, *Kluyveromyces lactis* and *Schizosaccharomyces pombe*.  
606 *Yeast (Chichester, England).* 6, 483-90 (1990).

607 Derksen, J., Janssen, G. J., Wolters-Arts, M., Lichtscheidl, I., Adlassnig, W., Ovecka, M., Doris, F.,  
608 & Steer, M. Wall architecture with high porosity is established at the tip and maintained in growing  
609 pollen tubes of *Nicotiana tabacum*. *Plant J.* 68, 495-506 (2011).

610 Desprez, T., Vernhettes, S., Fagard, M., Refregier, G., Desnos, T., Aletti, E., Py, N., Pelletier, S., and  
611 Hofte, H. Resistance against herbicide isoxaben and cellulose deficiency caused by distinct  
612 mutations in same cellulose synthase isoform CESA6. *Plant Physiol.* 128, 482-490 (2002).

613 Diet, A., Link, B., Seifert, G. J., Schellenberg, B., Wagner, U., Pauly, M., Reiter, W. D., & Ringli, C.  
614 The Arabidopsis root hair cell wall formation mutant *lrx1* is suppressed by mutations in the *RHM1*  
615 gene encoding a UDP-L-rhamnose synthase. *Plant Cell.* 18, 1630-1641 (2006).

616 Ding, S. Y., Liu, Y. S., Zeng, Y., Himmel, M. E., Baker, J. O., & Bayer, E. A. How does plant cell  
617 wall nanoscale architecture correlate with enzymatic digestibility? *Science.* 338, 1055-60 (2012).

618 Dixon, R. A. MICROBIOLOGY Break down the walls. *Nature.* 493, 36-37 (2013).

619 Donaldson, L. A., Kroese, H. W., Hill, S. J., & Franich, R. A. Detection of wood cell wall porosity  
620 using small carbohydrate molecules and confocal fluorescence microscopy. *J. Microscopy*. 259,  
621 228-236 (2015).

622 Ellsworth, P. A., Ellsworth P. Z., Koteyeva N. K., Cousins, A. B. Cell wall properties in *Oryza sativa*  
623 influence mesophyll CO<sub>2</sub> conductance. *New Phytologist* 219,66-76 (2018).

624 Gow, N. A. R., Latge, J. P., & Munro, C. A. The Fungal Cell Wall: Structure, Biosynthesis, and  
625 Function. *Microbiology spectrum*. 5, 3 (2017).

626 Griffing, L.R. FRET analysis of transmembrane flipping of FM4-64 in plant cells: is FM4-64 a  
627 robust marker for endocytosis? *J. Microscopy* 231,291-298 (2008).

628 Himmel, M. E., Ding, S. Y., Johnson, D. K., Adney, W. S., Nimlos, M. R., Brady, J. W., & Foust, T.  
629 D. Biomass recalcitrance: Engineering plants and enzymes for biofuels production. *Science*. 315,  
630 804-807 (2007).

631 Huang, K.C., Mukhopadhyay, R., Wen, B., Gitai, Z. & Wingreen, N.S. Cell shape and cell-wall  
632 organization in gram-negative bacteria. *Proc. Nat. Acad. USA*. 105, 19282-7 (2008).

633 Islahudin, F., Khozoie, C., Bates, S., Ting, K.-N., Pleass, R.J., Avery, S.V. Cell wall perturbation  
634 sensitise fungi to the antimalarial drug chloroquine. *Antimicrob. Agents Chemother*. 57, 3889-96  
635 (2013).

636 Klemm, D., Heublein, B., Fink, H.P., Bohn, A. Cellulose: fascinating biopolymer and sustainable raw  
637 material. *Angew. Chem. Int. Ed*. 44, :3358-93 (2005).

638 Lambert, P.A. Cellular impermeability and uptake of biocides and antibiotics in Gram - positive  
639 bacteria and mycobacteria. *J. Appl. Microbiol*. 92, 46S-54S (2002).

640 Lampugnani, E.R., Khan, G.A., Somssich, M., Persson, S. Building a plant cell wall at a glance. *J.*  
641 *Cell. Sci*. 131:2017373 (2018).

642 Lehrer, S. S. Solute perturbation of protein fluorescence. The quenching of the tryptophyl  
643 fluorescence of model compounds and of lysozyme by iodide ion. *Biochemistry*. 10, 3254-63  
644 (1971).

645 Liesche, J., Ziomkiewicz, I., Schulz, A. Super-resolution imaging with Pontamine Fast Scarlet 4BS  
646 enables direct visualization of cellulose orientation and cell connection architecture in onion  
647 epidermis cells. *BMC Plant Biol*. 13, 226 (2013).

648 Liesche, J., Marek, M., & Gunther-Pomorski, T. Cell wall staining with Trypan blue enables  
649 quantitative analysis of morphological changes in yeast cells. *Front. Microbiol.* 6, 107 (2015).

650 Mattei, P. J., Neves, D., & Dessen, A. Bridging cell wall biosynthesis and bacterial morphogenesis.  
651 *Curr. Opin. Struct. Biol.* 20, 749-755 (2010).

652 Meeske, A. J., Sham, L. T., Kimsey, H., Koo, B. M., Gross, C. A., Bernhardt, T. G., & Rudner, D. Z.  
653 MurJ and a novel lipid II flippase are required for cell wall biogenesis in *Bacillus subtilis*. *Proc.*  
654 *Natl. Acad. Sci. U S A.* 112, 6437-42 (2015).

655 Mishra, N.N., Prasad, T., Sharma, N., Payasi, A., Prasad, R., Gupta, D.K., Singh, R. Pathogenicity  
656 and drug resistance in *Candida albicans* and other yeast species. A review. *Acta Microbiol.*  
657 *Immunol.* 54, 201-35 (2007).

658 Okada, H., Kono, K., Neiman, A.M., and Ohya, Y. Examination and Disruption of the Yeast Cell  
659 Wall. *Cold Spring Harb Protoc.* (2016).

660 O'Neill, M. A., Eberhard, S., Albersheim, P., & Darvill, A. G. Requirement of borate cross-linking of  
661 cell wall rhamnogalacturonan II for *Arabidopsis* growth. *Science.* 294, 846-849 (2001).

662 Park, Y.B., and Cosgrove, D.J. A revised architecture of primary cell walls based on biomechanical  
663 changes induced by substrate-specific endoglucanases. *Plant Physiol.* 158, 1933-1943 (2012).

664 Reiter, W. D., Chapple, C., & Somerville, C. R. Mutants of *Arabidopsis thaliana* with altered cell wall  
665 polysaccharide composition. *Plant J.* 12, 335-345 (1997).

666 Rolinski, O. J., Birch, D. J. S., McCartney, L. J., & Pickup, J. C. Fluorescence resonance energy  
667 transfer from allophycocyanin to malachite green. *Chem. Phys. Lett.* 309, 395-401 (1999).

668 Savaldi-Goldstein, S., Peto, C., & Chory, J. The epidermis both drives and restricts plant shoot  
669 growth. *Nature.* 446, 199-202 (2007).

670 Schindelin, J., Arganda-Carreras, I., Frise, E., Kaynig, V., Longair, M., Pietzsch, T., Preibisch, S.,  
671 Rueden, C., Saalfeld, S., Schmid, B., Tinevez, J. Y., White, D. J., Hartenstein, V., Eliceiri, K.,  
672 Tomancak, P., & Cardona, A. Fiji: an open-source platform for biological-image analysis. *Nature*  
673 *Methods.* 9, 676-682 (2012).

674 Schneider, R., & Persson, S. Another brick in the wall. *Science.* 350, 156-157 (2015).

675 Somerville, C., Bauer, S., Brininstool, G., Facette, M., Hamann, T., Milne, J., Osborne, E., Paredez,  
676 A., Persson, S., Raab, T., Vorwerk, S., & Youngs, H. Toward a systems approach to understanding  
677 plant cell walls. *Science.* 306, 2206-11 (2004).

678 Strober, W. Trypan Blue Exclusion Test of Cell Viability. *Current protocols in immunology*. 111,  
679 A3.B.1-3 (2015).

680 Tavares, E. Q. P., De Souza, A. P., & Buckeridge, M. S. How endogenous plant cell-wall degradation  
681 mechanisms can help achieve higher efficiency in saccharification of biomass. *J. Exp. Bot.* 66,  
682 4133-4143 (2015).

683 Tateno, M., Brabham, C., and DeBolt, S. Cellulose biosynthesis inhibitors - a multifunctional toolbox.  
684 *J. Exp. Bot.* 67, 533-542 (2016).

685 Taylor-Teeple, M., Lin, L., de Lucas, M., Turco, G., Toal, T. W., Gaudinier, A., et al. An  
686 Arabidopsis gene regulatory network for secondary cell wall synthesis. *Nature*. 517, 571-5 (2015).

687 Tenhaken, R. Cell wall remodeling under abiotic stress. *Front. Plant Sci.* 5, 771 (2015).

688 Turner, R. D., Hurd, A. F., Cadby, A., Hobbs, J. K. & Foster SJ. Cell wall elongation mode in Gram-  
689 negative bacteria is determined by peptidoglycan architecture. *Nat. Commun.* 4:1496 (2013).

690 Verhertbruggen, Y., Walker, J. L., Guillon, F., & Scheller, H. V. A Comparative Study of Sample  
691 Preparation for Staining and Immunodetection of Plant Cell Walls by Light Microscopy. *Front.*  
692 *Plant Sci.* 8, 17 (2017).

693 Vida, T.A., Emr, S.D., A new vital stain for visualizing vacuolar membrane dynamics and  
694 endocytosis in yeast. *J. Cell Biol.* 128,779-792 (1995).

695 Wilhelm, M. J., Gh, M. S., & Dai, H. L. Chemically Induced Changes to Membrane Porosity in  
696 Living Cells Probed with Nonlinear Light Scattering. *Biochemistry*. 54, 4427-4430 (2015).

697 Winstel, V., Liang, C. G., Sanchez-Carballo, P., Steglich, M., Munar, M., Broker, B. M., Penades, J.  
698 R., Nubel, U., Holst, O., Dandekar, T., Peschel, A., & Xia, G. Q. Wall teichoic acid structure  
699 governs horizontal gene transfer between major bacterial pathogens. *Nat. Commun.* 4, 9 (2013).

700 Wu, Y, Yeh, F.L., Mao, F., Chapman, E.R. Biophysical Characterization of Styryl Dye-Membrane  
701 Interactions. *Biophys. J.* 97,101-109. (2009).

702 Xiao, C., Zhang, T., Zheng, Y., Cosgrove, D. J., & Anderson, C. T. Xyloglucan Deficiency Disrupts  
703 Microtubule Stability and Cellulose Biosynthesis in Arabidopsis, Altering Cell Growth and  
704 Morphogenesis. *Plant Physiol.* 170, 234-49 (2016).

705 Young, K. D. MICROBIOLOGY The bacterial cell wall takes centre stage. *Nature*. 537, 622-624  
706 (2016).

707 Zhang, P., Lock, L.L., Cheetham, A.G., Cui, H. Enhanced cellular entry and efficacy of Tat  
708 conjugates by rational design of the auxiliary segment. *Mol. Pharm.* 11, 964-973 (2014).  
709 Zheng, Y., Cosgrove, D. J., & Ning, G. High-Resolution Field Emission Scanning Electron  
710 Microscopy (FESEM) Imaging of Cellulose Microfibril Organization in Plant Primary Cell Walls.  
711 *Microsc. Microanal.* 23, 1048-1054 (2017).  
712 Zu, F. L., Yan, F. Y., Bai, Z. J., Xu, J. X., Wang, Y. Y., Huang, Y. C., & Zhou, X. G. The quenching  
713 of the fluorescence of carbon dots: A review on mechanisms and applications. *Microchim. Acta.*  
714 184, 1899-1914 (2017).

715

716

#### 717 **Abbreviations**

718 | 2-DG – 2-Deoxyglucose

719 | AFM – Atomic force microscopy

720 | BHQ3 – Black Hole Quencher 3

721 | CW – Calcofluor White

722 | DCBN – 2, 6-dichlorobenzonitrile

723 | ddH<sub>2</sub>O – double-distilled water

724 | DOPC – 1,2-dioleoyl-sn-glycero-3-phosphocholine

725 | FM4-64 – N-(3-Triethylammoniumpropyl)-4-(6-(4-(Diethylamino) Phenyl) Hexatrienyl) Pyridinium

726 | Dibromide

727 | GUV – Giant unilamellar vesicle

728 | HEK – Human embryonic kidney 293

729 | MG – Malachite Green

730 | MS – Murashige and Skoog

731 | [PB – Phosphate buffer](#)

732 | PBS – Phosphate buffered saline

733 | PEG – Polyethylene glycol

734 | ROI – Region of interest

735 | S4B – Pontamine Fast Scarlet S4B  
 736 | SDS – Sodiumdodecylsulfate  
 737 | TB – Trypan Blue  
 738 | TBSS – Tyrodes balanced salt solution  
 739 | TEM – Transmission electron microscopy

740

741

742

743

744

745 **Tables**

746 Table 1: Information on Arabidopsis cell wall mutants used in this study. HG – Homogalacturonan, RG –  
 747 Rhamnogalacturonan.

| Mutant name                  | Gene       | Description                             | Locus tag | Cell wall phenotype                 | Growth phenotype | References                             |
|------------------------------|------------|-----------------------------------------|-----------|-------------------------------------|------------------|----------------------------------------|
| <i>cesa3<sup>S211A</sup></i> | CESA3      | Cellulose synthase family protein       | AT5g05170 | ↓cellulose                          | Slightly dwarfed | Chen et al. 2016                       |
| <i>mur1</i>                  | MUR1       | GDP-D-mannose-4,6-dehydratase           | At3g51160 | ↓ fucose, ↓RG II cross-linking      | Slightly dwarfed | Reiter et al. 1997; O’Neil et al. 2001 |
| <i>mur10</i>                 | CESA7      | Cellulose synthase family protein       | AT5G17420 | ↓fucose ↓xylose ↑arabinose ↑mannose | Slightly dwarfed | Reiter et al. 1997; Bosca et al. 2006  |
| <i>mur11</i>                 | SAC9       | sacI homology domain-containing protein | AT3G59770 | ↓fucose ↓xylose ↑arabinose          | Dwarfed          | Reiter et al. 1997; Austin et al. 2011 |
| <i>roll</i>                  | RHM1       | UDP-L-Rhamnose synthase                 | At1g78570 | ↓RG II modified RG I                | Normal           | Diet et al. 2006                       |
| <i>xtt1 xtt2</i>             | XXT1, XXT2 | Xyloglucan Xylosyltransferase 1, 2      | At4g02500 | ↓Xyloglucan                         | Dwarfed          | Cavalier et al, 2008; Xiao et al. 2016 |

748

749

750

751

752

753

754

755

756

757 **Figures captions**

758

759 **Figure 1. Characteristics of the quenchers Black Hole Quencher 3 (BHQ3), Malachite Green (MG) and**  
760 **Trypan Blue (TB).** (A) Space filling model of hydrated quencher molecules in minimum energy configuration  
761 showing diameter and charges. (B) Fluorescence lifetime of Bodipy FL in PBS in the absence or presence of TB  
762 at the indicated concentrations showing a concentration-dependent reduction in lifetime. (C) Comparison of the  
763 absorption spectra of BHQ3, MG and TB in PBS with the emission spectrum of FM4-64 labeled *S. cerevisiae*  
764 cells. For details see Material and methods. Spectra were normalized to the respective maxima.

765

766 **Figure 2. Dependence of quenching of FM4-64 by Trypan blue (TB) on accessibility.** (A) FM4-64 labeled  
767 giant unilamellar vesicles (GUVs) imaged by fluorescence microscopy in the absence (control) or presence of  
768 TB at the indicated concentration, and (B) the corresponding intensity plot. (C, D, E) FM4-64 labeled human  
769 embryonic kidney (HEK) cells (C), *S. cerevisiae* cells (D), and *E. coli* cells (E) were imaged in the absence and  
770 presence of TB by fluorescence microscopy. (F) Stern-Volmer plots of FM4-64 fluorescence quenching by TB  
771 in GUVs, HEK cells, *S. cerevisiae* cells and *E. coli* cells. The slope of the regression line indicates quenching  
772 efficiency shown in panel (G). (H) Corresponding modified Stern-Volmer in which the intersection of the linear  
773 regression line corresponds to the fraction of quenchable fluorophores shown in panel (I). Dotted lines depict  
774 linear regression. All error bars indicate standard deviation of the mean ( $n \geq 6$ ). Standard deviation of the



775 quenchable fraction (**I**) was extrapolated from standard deviations of measurements at high quencher  
776 concentrations (**H**). Asterisks in panels (**G**) and (**I**) indicate statistically significant ( $P < 0.05$ ) difference to  
777 GUVs. Scale bars, 5  $\mu\text{m}$ .

778

779 **Figure 3. Relationship of quenching efficiency and cell wall structure in epidermis cells of *Arabidopsis***  
780 ***thaliana* wild-type plants and cell wall mutants.** (**A**) Wild-type, *cesa3*<sup>S211A</sup> and *xtt1xtt2* plant root epidermis  
781 cells were labeled with FM4-64 and imaged by fluorescence microscopy in the absence (control) and presence of  
782 the indicated quenchers (10  $\mu\text{M}$ ). (**B**) Quenching efficiency of different quenchers (Malachite Green – MG,  
783 Trypan Blue – TB, Black Hole Quencher 3 - BHQ3) on wild-type and mutant plants and wild-type plants treated  
784 with cell-wall modifying agents 2, 6-dichlorobenzonitrile (DCBN), isoxaben and polyethyleneglycol (PEG).  
785 Lines mark the quenching efficiency in wild-type plants. (**C**) Root epidermis cells stained with the cellulose-  
786 specific dye Pontamine Fast Scarlet S4B, imaged by fluorescence microscopy. Blue rectangles indicate the area  
787 corresponding to the overlaid histograms. Lower intensity mean value indicates larger spacing between cellulose  
788 fibrils. (**D**) Quenching efficiency plotted against mean intensity showing a significant correlation for all three  
789 quenchers. Both parameters were measured on all samples shown in (B), as well as other cell wall mutants listed  
790 in Table 1. Asterisks in (B) indicate significant difference ( $P < 0.05$ ) from wild-type. All error bars indicate  
791 standard deviation of the mean. Regression lines in (D) indicate significant correlation ( $P < 0.05$ ). Number of  
792 biological replicates  $n \geq 4$ . Scale bars, 20  $\mu\text{m}$  (A), 10  $\mu\text{m}$  (C).

793

794 **Figure 4. Atomic force microscopy images of the inner epidermal cell wall layer.** Spacing between wall  
795 polysaccharides appears larger in wild-type (**A**) than in the *cesa3*<sup>S211A</sup> mutant (**B**) plants. Scale bars, 100 nm.

796

797 **Figure 5. Cell wall thickness of root epidermis cells of *Arabidopsis thaliana* wild-type plants and cell wall**  
798 **mutants.** (**A**) Cell wall thickness as determined by transmission electron microscopy plotted against Trypan  
799 Blue quenching efficiency showing no correlation between the two parameters. (**B-D**) Representative electron  
800 micrographs of epidermal cell walls from wild-type (B), *mur11* (C), and *roll1* (D). Error bars indicate standard  
801 deviation of the mean. Scale bars, 100 nm.

802

803 **Figure 6. Correlation analysis of quenching efficiency, cell length and root length in *Arabidopsis thaliana***  
804 **seedlings.** Trypan blue quenching efficiency was determined in the FM4-64 labeled roots of wild-type and cell  
805 wall mutant plants exposed to different levels of drought stress simulated by PEG treatment. In addition to  
806 quenching efficiency, cell length (**A**) and root length (**B**) were measured in the absence (0%) and presence of  
807 PEG at moderate (10%) and high (20%) concentrations. Changes relative to control conditions were quantified

808 for quenching efficiency (C), cell length (D) and root length (E). Quenching efficiency significantly correlated  
809 with cell length (F), as did relative quenching efficiency with relative cell length (G), and cell length with root  
810 length (H). Regression lines indicate significant ( $P < 0.05$ ) correlation. All error bars indicate standard deviation  
811 of the mean. Asterisks indicate significant difference ( $P < 0.05$ ) compared to control conditions. Number of  
812 replicates  $n=5$  (C),  $n \geq 25$  (D),  $n \geq 20$  (E). Scale bars in (A), 10  $\mu\text{m}$ .

813

814 Figure. 7. **Effect of cell wall structure on antifungal drug efficiency in *S. cerevisiae*.** (A) Relative FM4-64  
815 quenching efficiency after treatment with cell wall-modifying factors compared to untreated cells (CW –  
816 Calcofluor White, 2-DG – 2-Deoxyglucose, EtOH – ethanol, SDS – Sodiumdodecylsulfate). (B) Cell counts  
817 over 24 h culture period in the absence (control) or presence of cell wall modifying chemicals and the antifungal  
818 drug Voriconazole (V). Combination of voriconazole and cell wall-modifying chemicals led to strong reduction  
819 in cell number. Similar results for this viability were observed with another antifungal drug Amphotericin B (A).  
820 (C) Synergism of cell wall-modifying chemicals and antifungal drugs plotted against quenching efficiency. (D-  
821 G) Field emission scanning electron micrographs of cells in the absence (D) or presence of the cell wall  
822 modifying chemicals CW (E), 2-DG (F) and SDS (G) at two magnifications. Only 2-DG-treated cells showed  
823 visible signs of compromised cell wall integrity (F). Error bars indicate standard deviation of the mean ( $n = 4$ ).  
824 Asterisks indicate significant difference ( $P < 0.05$ ) compared to control conditions. Scale bars, 500 nm.

825

826 Figure. 8. **Illustration of four parameters potentially affecting extracellular quenching:** wall thickness, the  
827 barrier-function of polysaccharides close the plasma membrane, wall porosity and the binding capacity of  
828 quencher molecules to wall components. The experimental data indicate that wall porosity is the main parameter  
829 that determines quenching efficiency.

830

831

832

833

834

835

836

837

838

839

840

841

842

843

844

845 **Supplemental figure captions**

846

847 Suppl. Fig. S1. **Quencher characteristics.** (A) Stern-Volmer plots showing the quenching efficiency for the  
848 indicated fluorescent dyes by Trypan Blue in water. (B) Comparison of absorption spectrum of Trypan Blue with  
849 the emission spectra of the same three fluorescent dyes. Correlation of quenching efficiency (A) with spectral  
850 overlap of quencher absorption and dye emission (B) supports the hypothesis that Trypan Blue quenching is  
851 based on Förster Resonance Energy Transfer. C, D Concentration-dependent absorbance of Black Hole  
852 Quencher 3 (BHQ3), Malachite Green (MG) and Trypan Blue (TB) at 488 nm (C) and 514 nm (D). It shows a  
853 low absorbance at the concentrations (up to 100  $\mu$ M) that are used in the quenching assays.

854

855 Suppl. Figure S2. **Plasmolysis of onion epidermis cells stained with FM4-64.** A layer of onion epidermis was  
856 stained with 20  $\mu$ M FM4-64 for 3 min, rinsed with PBS, covered with 30 % (w/v) sucrose on the slide and  
857 imaged after 5 min of incubation by phase contract and fluorescence microscopy. (A) Overview, (B) magnified  
858 area as indicated by black box in (A). Scale bars, 10  $\mu$ m (A), 1  $\mu$ m (B).

859

860 Suppl. Figure S3. **Application of the quenching assay to maize leaves.** (A) Images of maize leaf epidermis  
861 cells labeled with FM4-64 in the absence (control) or presence of Trypan Blue at the indicated concentration. (B)  
862 Stern-Volmer plot in which the slope of the regression line indicates quenching efficiency. Error bars indicate  
863 standard deviation of the mean (n=4). Scale bar, 50  $\mu$ m.

864

865 Suppl. Figure. S4. **Quenchable fraction and quenching efficiency in cell wall mutants.** (A) Modified Stern-  
866 Volmer plot indicating quenchable fraction in Arabidopsis wild-type and cell wall mutant plants. The fraction of  
867 FM4-64 fluorescence quenched by Trypan Blue can be calculated from the y-axis crossing point of regression  
868 lines according to equation 2. (B) Comparison of quenchable fractions indicates limited variation between wild-  
869 type and mutant plants. (C-E) Quenching efficiency (C), cell length (D) and root length (E) of *Arabidopsis*  
870 *thaliana* wild type and mutant plants grown under control conditions. Quenching efficiency (C) and cell length  
871 (D) were determined for epidermis cells of the elongation zone. All error bars indicate standard deviation of the  
872 mean. Asterisks indicate significant difference ( $P < 0.05$ ) from wild-type. Number of replicates  $N=4$  (A-C),  $N > 20$   
873 (D, E).

874

875 Suppl. Figure S5. **Quantification of peripheral membrane fluorescence.** Mean fluorescence was measured in  
876 a region of interest (yellow box) with constant size in each of the experimental systems. (A) Giant unilamellar  
877 vesicles, (B) *Saccharomyces cerevisiae*, (C) Cultured human embryonic kidney cells, (D) *Escherichia coli*, (E)  
878 Arabidopsis root cells. Scale bars, 5  $\mu\text{m}$ .

879
